# Supplementary material for: Theoretical studies on iron-catalyzed azaindoline formation: mechanism and site-selectivity
Source: Royal Society of Chemistry journal article supplement (doi:10.1039/d1dt02373j), 2021-01-01
Supplement: d1dt02373j1.pdf [file d1dt02373j1.pdf]

## Supporting Information

### Theoretical Studies on Iron-Catalyzed Azaindoline Formation: Mechanism and Site-selectivity

Juping Wang,<sup>\*a</sup> Rongxing Xiao,<sup>a</sup> Kangcheng Zheng,<sup>b</sup> and Li Qian<sup>c</sup>

<sup>a</sup>School of Pharmacy, Guangdong Pharmaceutical University, Guangzhou 510006, China

<sup>b</sup>School of Chemistry, Sun Yat-sen University, Guangzhou, 510275, P. R. China

<sup>c</sup>School of Pharmacy, Youjiang Medical University for Nationalities, 533000, P. R. China.

Email address: [jupingwang@gdpu.edu.cn](mailto:jupingwang@gdpu.edu.cn)

## Table of Contents

|                                                                                                       |    |
|-------------------------------------------------------------------------------------------------------|----|
| 1. Free energy profile of $sp^3$ C-H amination for the alkyl chain substrate TA (Fig. S1) .....       | S3 |
| 2. Catalytic cycles of $sp^3$ - vs. $sp^2$ C-H bond aminations for the substrate TA' (Fig. S2).....   | S4 |
| 3. Catalytic cycles of $sp^3$ - vs. $sp^2$ C-H bond aminations for the substrate TA'' (Fig. S3).....  | S5 |
| 4. Calculation energies of $sp^3$ C-H amination species for alkyl chain substrate TA (Table S1).....  | S6 |
| 5. Calculation energies of $sp^3$ C-H amination species for aryl chain substrate TA' (Table S2).....  | S7 |
| 6. Calculation energies of $sp^3$ C-H amination species for aryl chain substrate TA'' (Table S3)..... | S7 |
| 7. Cartesian coordinates of species.....                                                              | S8 |

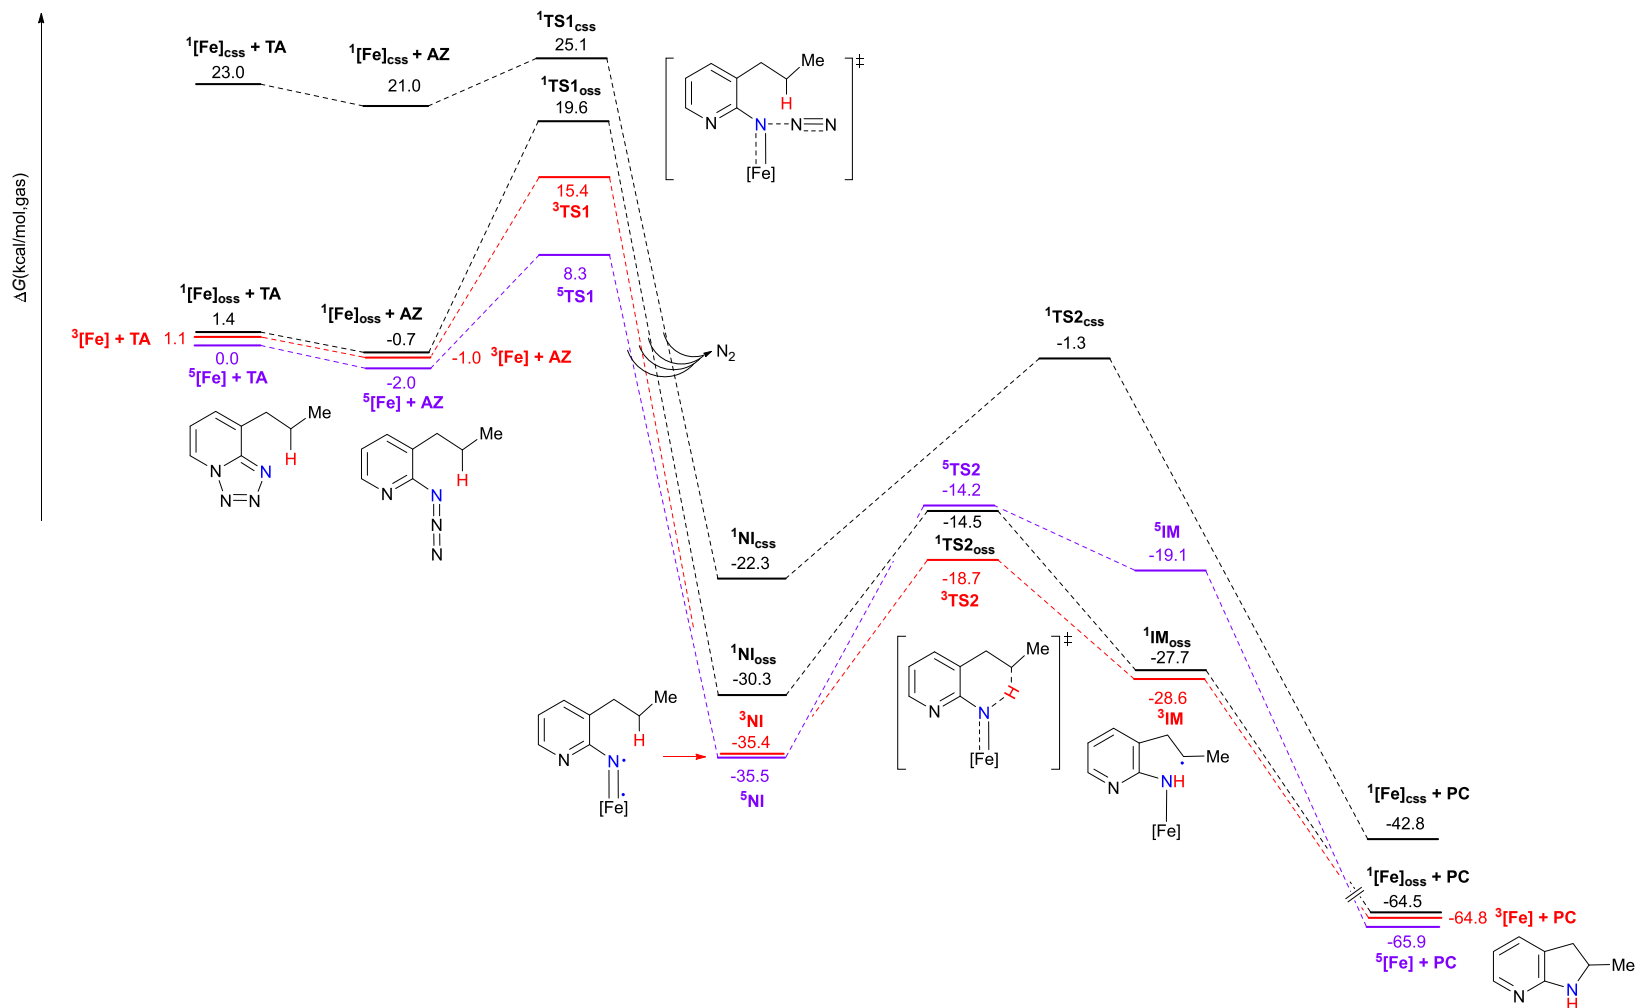

**Fig. S1** Gibbs free energy profile of close- and open-shell singlet, triplet and quintet pathways for Fe-catalyzed C(sp<sup>3</sup>)-H amination. Based on comparison of energy, the most favorable transition state is quintet **<sup>5</sup>TS1** for N<sub>2</sub> release and triplet **<sup>3</sup>TS2** for H-atom abstraction. For overall C(sp<sup>3</sup>)-H amination, the most favorable pathway is **<sup>5</sup>[Fe] + TA → <sup>5</sup>[Fe] + AZ → <sup>5</sup>TS1 → <sup>3</sup>NI + N<sub>2</sub> → <sup>3</sup>TS2 → <sup>3</sup>IM → <sup>5</sup>[Fe] + PC**.

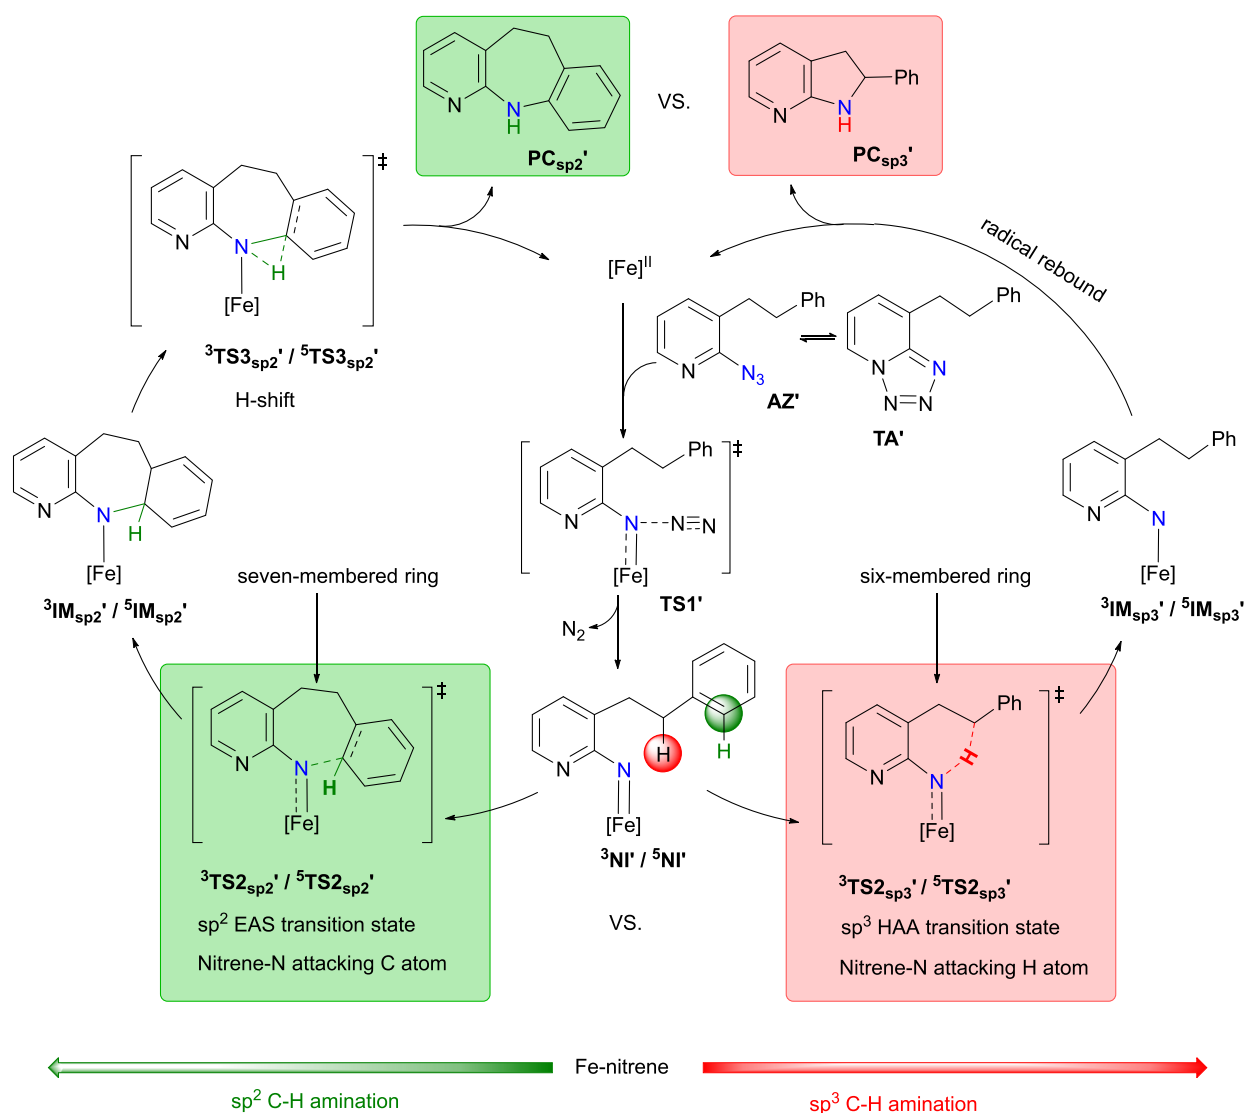

**Fig. S2** Catalytic cycles of  $sp^3$ - and  $sp^2$  C-H bond aminations for the substrate  $TA'$ . Obviously,  $sp^3$ -to- $sp^2$  C-H bond site-selectivity occurs after metal-nitrene is formed. Thus our investigations on site-selectivity start from Fe-nitrene. In addition, for  $sp^3$  C-H amination mechanism, H-atom abstraction (HAA) for N-H bond formation preceding radical rebound (for C-N bond formation). Conversely, electrophilic aromatic substitution (EAS) for C-N bond formation preceding H-shift step (for N-H bond formation) in  $sp^2$  C-H amination mechanism. Based on previous literature report (ACS Catal., 2018, 8, 8369–8375.),  $sp^3$ -to- $sp^2$  C-H bond site-selectivity depends on barriers of HAA vs. EAS steps, thus Fe-nitrene and transition states of HAA and EAS are calculated for competition. In terms of spin states, the triplet and quintet are calculated because they are involved the most favorable pathway on the basis of the mechanism established in this work.

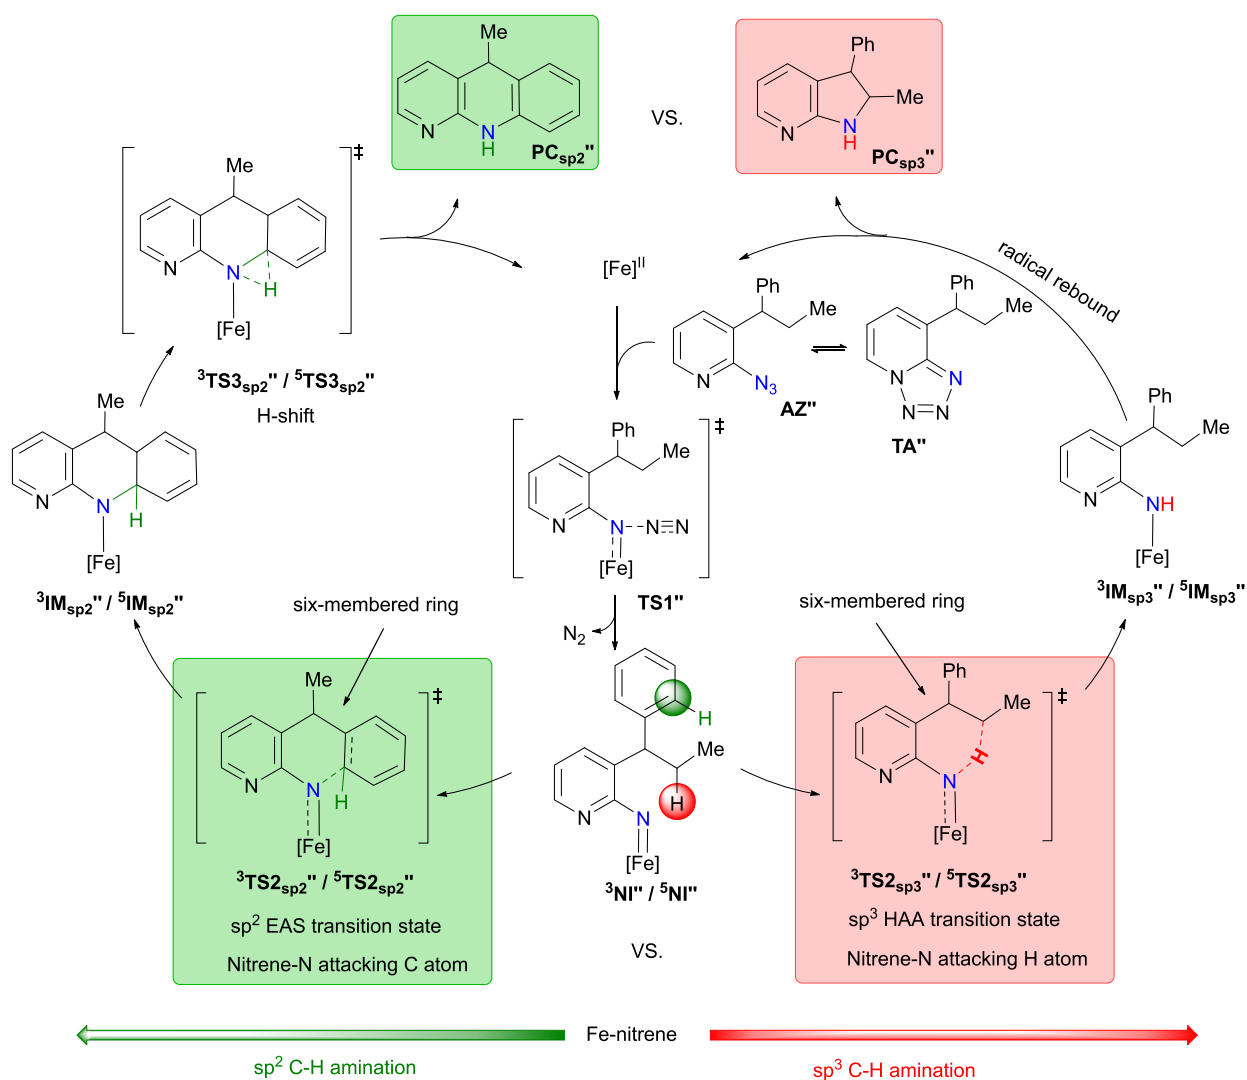

**Fig. S3** Catalytic cycles for sp<sup>3</sup>- and sp<sup>2</sup> C-H bond aminations of the substrate **TA**. HAA: H-atom abstraction. EAS: electrophilic aromatic substitution. The sp<sup>3</sup>-to-sp<sup>2</sup> C-H bond site-selectivity depends on barriers of HAA vs. EAS steps. The triplet and quintet Fe-nitrene and transition states are calculated because they are involved the most favorable pathway on the basis of the mechanism established in this report.

**Table S1** Calculation energies of sp<sup>3</sup> C-H amination species for alkyl chain substrate **TA** at 393K (unit: a.u.).

| Species                               | Thermal Correction of Gibbs Energies (BS1, gas) | Gibbs Free Energies (BS1, gas) | Singlet Point Energies (BS2, gas) | Singlet Point Energies (BS2, sol) |
|---------------------------------------|-------------------------------------------------|--------------------------------|-----------------------------------|-----------------------------------|
| <b><sup>1</sup>[Fe]<sub>css</sub></b> | 0.211141                                        | -1111.665381                   | -1112.21938385                    | -1112.25078453                    |
| <b><sup>1</sup>[Fe]<sub>oss</sub></b> | 0.210573                                        | -1111.698667                   | -1112.25333521                    | -1112.27941015                    |
| <b><sup>3</sup>[Fe]</b>               | 0.209134                                        | -1111.699139                   | -1112.25240453                    | -1112.27924866                    |
| <b><sup>5</sup>[Fe]</b>               | 0.205837                                        | -1111.698333                   | -1112.25078638                    | -1112.28267567                    |
| <b>TA</b>                             | 0.127569                                        | -529.710665                    | -530.00942104                     | -530.02195655                     |
| <b>AZ</b>                             | 0.123300                                        | -529.710274                    | -530.00839375                     | -530.01537444                     |
| <b><sup>1</sup>TS1<sub>css</sub></b>  | 0.361961                                        | -1641.366822                   | -1642.24870085                    | -1642.27656099                    |
| <b><sup>1</sup>TS1<sub>oss</sub></b>  | 0.359317                                        | -1641.371646                   | -1642.25489540                    | -1642.28487342                    |
| <b><sup>3</sup>TS1</b>                | 0.358981                                        | -1641.379459                   | -1642.26120274                    | -1642.29067517                    |
| <b><sup>5</sup>TS1</b>                | 0.354611                                        | -1641.384765                   | -1642.26819889                    | -1642.29827342                    |
| <b>N<sub>2</sub></b>                  | -0.019923                                       | -109.540641                    | -109.56018454                     | -109.55470218                     |
| <b><sup>1</sup>Ni<sub>css</sub></b>   | 0.359936                                        | -1531.895781                   | -1532.74216055                    | -1532.77539918                    |
| <b><sup>1</sup>Ni<sub>oss</sub></b>   | 0.356384                                        | -1531.90772                    | -1532.75130819                    | -1532.78493978                    |
| <b><sup>3</sup>Ni</b>                 | 0.354974                                        | -1531.914984                   | -1532.75803596                    | -1532.79232418                    |
| <b><sup>5</sup>Ni</b>                 | 0.350706                                        | -1531.90881                    | -1532.75402428                    | -1532.78779525                    |
| <b><sup>1</sup>TS2<sub>css</sub></b>  | 0.355875                                        | -1531.858483                   | -1532.70456794                    | -1532.73869628                    |
| <b><sup>1</sup>TS2<sub>oss</sub></b>  | 0.354005                                        | -1531.8778                     | -1532.72381902                    | -1532.75782734                    |
| <b><sup>3</sup>TS2</b>                | 0.352042                                        | -1531.884214                   | -1532.72847160                    | -1532.76280997                    |
| <b><sup>5</sup>TS2</b>                | 0.348019                                        | -1531.876264                   | -1532.71742073                    | -1532.75232881                    |
| <b><sup>1</sup>IM<sub>oss</sub></b>   | 0.354893                                        | -1531.897633                   | -1532.74578347                    | -1532.78004898                    |
| <b><sup>3</sup>IM</b>                 | 0.353642                                        | -1531.89909                    | -1532.74591219                    | -1532.78020884                    |
| <b><sup>5</sup>IM</b>                 | 0.348519                                        | -1531.88108                    | -1532.72562194                    | -1532.75962086                    |
| <b>PC</b>                             | 0.123738                                        | -420.263804                    | -420.53043049                     | -420.54330749                     |

**Table S2** Calculation energies of sp<sup>3</sup> H-abstraction vs. sp<sup>2</sup> electrocyclization species for aryl chain substrate **TA'** at 393K (unit: a.u.).

|                                  | Thermal Correction of Gibbs Energies (BS1, gas) | Gibbs Free Energies (BS1, gas) | Singlet Point Energies (BS2, gas) | Singlet Point Energies (BS2, sol) |
|----------------------------------|-------------------------------------------------|--------------------------------|-----------------------------------|-----------------------------------|
| <sup>3</sup> NI'                 | 0.401375                                        | -1723.612851                   | -1724.56550581                    | -1724.60381062                    |
| <sup>5</sup> NI'                 | 0.395157                                        | -1723.608807                   | -1724.56182014                    | -1724.59996503                    |
| <sup>3</sup> TS <sub>sp3</sub> ' | 0.396574                                        | -1723.588137                   | -1724.54013389                    | -1724.57828936                    |
| <sup>5</sup> TS <sub>sp3</sub> ' | 0.392451                                        | -1723.580758                   | -1724.52805481                    | -1724.56732562                    |
| <sup>3</sup> TS <sub>sp2</sub> ' | 0.406762                                        | -1723.575374                   | -1724.53281747                    | -1724.56795342                    |
| <sup>5</sup> TS <sub>sp2</sub> ' | 0.401785                                        | -1723.570773                   | -1724.52408240                    | -1724.56003107                    |

**Table S3** Calculation energies of sp<sup>3</sup> H-abstraction vs. sp<sup>2</sup> electrocyclization species for aryl chain substrate **TA''** at 393K (unit: a.u.).

|                                   | Thermal Correction of Gibbs Energies (BS1, gas) | Gibbs Free Energies (BS1, gas) | Singlet Point Energies (BS2, gas) | Singlet Point Energies (BS2, sol) |
|-----------------------------------|-------------------------------------------------|--------------------------------|-----------------------------------|-----------------------------------|
| <sup>3</sup> NI''                 | 0.428082                                        | -1762.901617                   | -1763.89403716                    | -1763.93172840                    |
| <sup>5</sup> NI''                 | 0.422516                                        | -1762.896474                   | -1763.88917003                    | -1763.92725036                    |
| <sup>3</sup> TS <sub>sp3</sub> '' | 0.423166                                        | -1762.875896                   | -1763.86693491                    | -1763.90488627                    |
| <sup>5</sup> TS <sub>sp3</sub> '' | 0.418565                                        | -1762.868544                   | -1763.85565751                    | -1763.89450875                    |
| <sup>3</sup> TS <sub>sp2</sub> '' | 0.431705                                        | -1762.861832                   | -1763.85833151                    | -1763.89446645                    |
| <sup>5</sup> TS <sub>sp2</sub> '' | 0.427317                                        | -1762.861464                   | -1763.85234361                    | -1763.88920504                    |

### Cartesian coordinates of species

#### <sup>1</sup>[Fe]

|    |             |             |             |
|----|-------------|-------------|-------------|
| C  | -3.41158500 | 0.29033200  | -0.00023100 |
| C  | 0.29033500  | 3.41158600  | 0.00016600  |
| C  | 3.41158500  | -0.29033800 | -0.00013000 |
| C  | -0.29033500 | -3.41158100 | 0.00016300  |
| C  | -2.66978200 | 1.46373800  | -0.00013400 |
| C  | -3.24130300 | 2.78842800  | -0.00015900 |
| C  | -2.20061100 | 3.66587900  | -0.00000300 |
| C  | -0.99154800 | 2.87873200  | 0.00009200  |
| C  | 1.46374200  | 2.66977900  | 0.00013000  |
| C  | 2.78843600  | 3.24129200  | 0.00006600  |
| C  | 3.66588800  | 2.20060100  | -0.00005900 |
| C  | 2.87873400  | 0.99154400  | -0.00004800 |
| C  | 2.66977900  | -1.46374500 | -0.00005300 |
| C  | 3.24128800  | -2.78843200 | -0.00006900 |
| C  | 2.20059700  | -3.66588200 | 0.00005500  |
| C  | 0.99154700  | -2.87873100 | 0.00012400  |
| C  | -1.46374100 | -2.66977900 | 0.00009500  |
| C  | -2.78842300 | -3.24129800 | 0.00000400  |
| C  | -3.66587400 | -2.20060700 | -0.00014500 |
| C  | -2.87873200 | -0.99155100 | -0.00013100 |
| N  | -1.29398600 | 1.53471900  | -0.00000500 |
| N  | 1.53471900  | 1.29398500  | 0.00004300  |
| N  | 1.29397800  | -1.53470800 | 0.00004100  |
| N  | -1.53470900 | -1.29397700 | -0.00000600 |
| H  | -4.49348800 | 0.38240400  | -0.00041800 |
| H  | 0.38241000  | 4.49348900  | 0.00015600  |
| H  | 4.49348800  | -0.38241600 | -0.00029200 |
| H  | -0.38240900 | -4.49348400 | 0.00015300  |
| Fe | 0.00000100  | 0.00000400  | 0.00005100  |
| H  | -4.30312800 | 2.99995700  | -0.00018200 |
| H  | -2.22966300 | 4.74818000  | 0.00012400  |
| H  | -4.74817600 | -2.22966400 | -0.00016200 |
| H  | -2.99995600 | -4.30312400 | 0.00013300  |
| H  | 2.22965000  | -4.74818500 | 0.00017500  |
| H  | 4.30311200  | -2.99996700 | -0.00006800 |
| H  | 4.74819000  | 2.22965100  | -0.00005600 |
| H  | 2.99996700  | 4.30311700  | 0.00019100  |

#### <sup>1</sup>[Fe]<sub>oss</sub>

|   |             |             |             |
|---|-------------|-------------|-------------|
| C | -0.32963500 | 3.40869200  | -0.00007500 |
| C | 3.40941900  | 0.32969600  | 0.00012000  |
| C | 0.32967400  | -3.40874500 | 0.00009000  |



|    |             |             |             |
|----|-------------|-------------|-------------|
| C  | -3.40946300 | -0.32964600 | -0.00012900 |
| C  | 0.95742200  | 2.88864500  | -0.00001800 |
| C  | 2.15547100  | 3.68876900  | 0.00002000  |
| C  | 3.20745700  | 2.82257500  | 0.00005300  |
| C  | 2.65237200  | 1.49320400  | 0.00007000  |
| C  | 2.88931400  | -0.95730700 | 0.00012900  |
| C  | 3.68889200  | -2.15562600 | 0.00017300  |
| C  | 2.82240100  | -3.20738000 | 0.00018700  |
| C  | 1.49324400  | -2.65175400 | 0.00011600  |
| C  | -0.95740400 | -2.88873600 | 0.00002600  |
| C  | -2.15544600 | -3.68878100 | 0.00000200  |
| C  | -3.20741500 | -2.82253200 | -0.00007700 |
| C  | -2.65233200 | -1.49315500 | -0.00007300 |
| C  | -2.88940400 | 0.95741400  | -0.00013300 |
| C  | -3.68889600 | 2.15578800  | -0.00019400 |
| C  | -2.82233200 | 3.20749100  | -0.00016300 |
| C  | -1.49321700 | 2.65170000  | -0.00010800 |
| N  | 1.27490800  | 1.54742900  | 0.00001700  |
| N  | 1.54778000  | -1.27447900 | 0.00008500  |
| N  | -1.27485000 | -1.54745000 | -0.00001800 |
| N  | -1.54787500 | 1.27447600  | -0.00008600 |
| H  | -0.43413800 | 4.48932200  | -0.00009400 |
| H  | 4.49007200  | 0.43417100  | 0.00015200  |
| H  | 0.43417600  | -4.48938400 | 0.00012300  |
| H  | -4.49011900 | -0.43410000 | -0.00017400 |
| Fe | -0.00002600 | -0.00008000 | -0.00000300 |
| H  | -4.26645200 | -3.04754500 | -0.00012300 |
| H  | -2.17311100 | -4.77132300 | 0.00003100  |
| H  | 3.04719600  | -4.26646600 | 0.00022800  |
| H  | 4.77142700  | -2.17357100 | 0.00020300  |
| H  | 4.26650300  | 3.04757100  | 0.00007800  |
| H  | 2.17304100  | 4.77130600  | 0.00000800  |
| H  | -3.04697500 | 4.26660900  | -0.00018500 |
| H  | -4.77142700 | 2.17379100  | -0.00024400 |

<sup>3</sup>[Fe]

|   |             |             |             |
|---|-------------|-------------|-------------|
| C | 0.00082300  | -3.42365300 | -0.00007500 |
| C | -3.42385600 | -0.00081500 | 0.00007100  |
| C | -0.00080800 | 3.42365300  | 0.00008800  |
| C | 3.42387900  | 0.00081500  | -0.00016900 |
| C | -1.22938800 | -2.78368000 | -0.00001300 |
| C | -2.50089200 | -3.46431600 | 0.00004800  |
| C | -3.46317200 | -2.50257200 | 0.00008800  |
| C | -2.78324100 | -1.23069300 | 0.00004400  |
| C | -2.78382700 | 1.22936700  | 0.00010400  |
| C | -3.46436400 | 2.50092200  | 0.00021200  |
| C | -2.50254200 | 3.46312500  | 0.00021600  |

|    |             |             |             |
|----|-------------|-------------|-------------|
| C  | -1.23071300 | 2.78309400  | 0.00012000  |
| C  | 1.22938300  | 2.78365100  | 0.00002900  |
| C  | 2.50088800  | 3.46430900  | 0.00003100  |
| C  | 3.46317600  | 2.50257800  | -0.00004400 |
| C  | 2.78325300  | 1.23068700  | -0.00009400 |
| C  | 2.78383900  | -1.22936100 | -0.00015200 |
| C  | 3.46436700  | -2.50092900 | -0.00016200 |
| C  | 2.50253800  | -3.46311800 | -0.00013400 |
| C  | 1.23070800  | -2.78306600 | -0.00010200 |
| N  | -1.41774800 | -1.41829100 | -0.00000600 |
| N  | -1.41842300 | 1.41761600  | 0.00006100  |
| N  | 1.41776900  | 1.41826700  | -0.00003600 |
| N  | 1.41844400  | -1.41759200 | -0.00010300 |
| H  | 0.00109900  | -4.50917000 | -0.00010200 |
| H  | -4.50937300 | -0.00107400 | 0.00008800  |
| H  | -0.00104800 | 4.50917000  | 0.00011300  |
| H  | 4.50939500  | 0.00107400  | -0.00023100 |
| Fe | -0.00002500 | 0.00000000  | -0.00000500 |
| H  | 4.53909500  | 2.62224400  | -0.00009200 |
| H  | 2.61994100  | 4.54029800  | 0.00005300  |
| H  | -2.62212600 | 4.53905400  | 0.00025000  |
| H  | -4.54034100 | 2.62007400  | 0.00024500  |
| H  | -4.53909200 | -2.62223700 | 0.00011300  |
| H  | -2.61996300 | -4.54030200 | 0.00002900  |
| H  | 2.62210400  | -4.53905000 | -0.00016400 |
| H  | 4.54034400  | -2.62008200 | -0.00021600 |

<sup>5</sup>[Fe]

|   |             |             |             |
|---|-------------|-------------|-------------|
| C | -3.43968200 | -0.09166100 | -0.00008300 |
| C | -0.09166100 | 3.43968000  | -0.00006900 |
| C | 3.43968200  | 0.09166100  | -0.00004400 |
| C | 0.09166100  | -3.43968000 | -0.00006300 |
| C | -2.84954000 | 1.17728500  | -0.00004200 |
| C | -3.56188700 | 2.43539600  | -0.00031900 |
| C | -2.62164700 | 3.42712500  | -0.00034500 |
| C | -1.32738100 | 2.78279500  | -0.00036000 |
| C | 1.17728500  | 2.84953800  | -0.00002000 |
| C | 2.43539500  | 3.56188600  | -0.00033300 |
| C | 3.42712500  | 2.62164700  | -0.00029600 |
| C | 2.78279700  | 1.32738100  | -0.00000900 |
| C | 2.84954000  | -1.17728500 | -0.00001000 |
| C | 3.56188700  | -2.43539600 | -0.00029900 |
| C | 2.62164700  | -3.42712500 | -0.00030100 |
| C | 1.32738100  | -2.78279500 | -0.00001800 |
| C | -1.17728500 | -2.84953700 | -0.00003200 |
| C | -2.43539600 | -3.56188600 | -0.00034900 |
| C | -3.42712500 | -2.62164700 | -0.00032300 |

|    |             |             |             |
|----|-------------|-------------|-------------|
| C  | -2.78279700 | -1.32738100 | -0.00004300 |
| N  | -1.49706700 | 1.41934900  | 0.00022600  |
| N  | 1.41935100  | 1.49706500  | 0.00025400  |
| N  | 1.49706700  | -1.41934900 | 0.00024700  |
| N  | -1.41935100 | -1.49706500 | 0.00023400  |
| H  | -4.52589100 | -0.12060300 | -0.00027600 |
| H  | -0.12060300 | 4.52588900  | -0.00027700 |
| H  | 4.52589100  | 0.12060300  | -0.00023500 |
| H  | 0.12060300  | -4.52588900 | -0.00026100 |
| Fe | 0.00000000  | 0.00000000  | 0.00065000  |
| H  | -2.78302900 | 4.49805600  | -0.00057900 |
| H  | -4.63989500 | 2.53950900  | -0.00053300 |
| H  | -4.49805700 | -2.78303100 | -0.00054200 |
| H  | -2.53950700 | -4.63989400 | -0.00058700 |
| H  | 2.78302900  | -4.49805600 | -0.00052100 |
| H  | 4.63989500  | -2.53950900 | -0.00051700 |
| H  | 4.49805700  | 2.78303000  | -0.00051100 |
| H  | 2.53950700  | 4.63989400  | -0.00057900 |

**TA**

|   |             |             |             |
|---|-------------|-------------|-------------|
| C | 0.50109300  | -0.38953500 | 0.19043800  |
| C | -0.38215900 | 0.71812600  | 0.32976300  |
| C | 0.17553000  | 1.96566600  | 0.15339600  |
| C | 1.55921900  | 2.13986000  | -0.15071700 |
| C | 2.38649200  | 1.05977000  | -0.27741800 |
| N | 1.82766800  | -0.17777500 | -0.10082500 |
| H | -0.45391100 | 2.84584600  | 0.25000400  |
| H | 1.96690900  | 3.13581200  | -0.28276700 |
| H | 3.44433400  | 1.08415500  | -0.50348000 |
| N | 0.31731900  | -1.71006900 | 0.29099400  |
| N | 1.51926900  | -2.26832500 | 0.06323900  |
| N | 2.44936700  | -1.38714600 | -0.17527200 |
| C | -1.83712100 | 0.47019000  | 0.62521100  |
| H | -2.31403200 | 1.41477900  | 0.91513100  |
| H | -1.91664000 | -0.21105600 | 1.48230000  |
| C | -2.59361600 | -0.15068200 | -0.56829800 |
| H | -2.50440200 | 0.51760000  | -1.43510600 |
| H | -2.10633700 | -1.09380700 | -0.83995600 |
| C | -4.06958300 | -0.39736200 | -0.24451500 |
| H | -4.58179200 | 0.53679100  | 0.01839100  |
| H | -4.59287400 | -0.83685600 | -1.10079700 |
| H | -4.17575300 | -1.08626500 | 0.60216100  |

**AZ**

|   |             |             |             |
|---|-------------|-------------|-------------|
| C | 0.74342300  | 0.09182500  | -0.12460700 |
| C | -0.31730900 | -0.81310800 | -0.34184800 |
| C | 0.00164700  | -2.16377900 | -0.20224800 |

|   |             |             |             |
|---|-------------|-------------|-------------|
| C | 1.30038800  | -2.55685300 | 0.13062300  |
| C | 2.25815900  | -1.56264100 | 0.31590200  |
| N | 1.99172200  | -0.25716200 | 0.19081600  |
| H | -0.77459700 | -2.90929900 | -0.35868400 |
| H | 1.56188500  | -3.60448200 | 0.24003800  |
| H | 3.28477500  | -1.81502000 | 0.57383200  |
| N | 0.44130400  | 1.47051000  | -0.25988100 |
| C | -1.71437100 | -0.34245200 | -0.66279100 |
| H | -2.27197000 | -1.16269400 | -1.13356300 |
| H | -1.67137000 | 0.47513500  | -1.39253700 |
| C | -2.48174900 | 0.14309700  | 0.58383300  |
| H | -2.52946100 | -0.67497700 | 1.31503900  |
| H | -1.91217800 | 0.95290100  | 1.05533900  |
| C | -3.89411100 | 0.62682100  | 0.24376100  |
| H | -4.48785400 | -0.17332000 | -0.21591200 |
| H | -4.42533600 | 0.96478800  | 1.14061400  |
| H | -3.86250000 | 1.46500400  | -0.46306500 |
| N | 1.38076100  | 2.26126200  | -0.06960400 |
| N | 2.14509100  | 3.08889100  | 0.07912000  |

<sup>1</sup>TS1<sub>css</sub>

|   |             |             |             |
|---|-------------|-------------|-------------|
| H | -5.71277700 | -0.59876100 | 0.61897400  |
| C | -4.71559100 | -0.86218900 | 0.28964000  |
| C | -4.22077500 | -2.09122200 | -0.02410000 |
| C | -3.64073400 | 0.07978400  | 0.10289000  |
| C | -2.84467900 | -1.90176400 | -0.40814200 |
| H | -4.72842000 | -3.04742900 | -0.01001400 |
| N | -2.49995800 | -0.56746600 | -0.32602600 |
| C | -3.74706600 | 1.43979800  | 0.35981000  |
| C | -2.00794200 | -2.92502900 | -0.82523500 |
| C | -2.72216700 | 2.36213300  | 0.20064200  |
| H | -4.70632300 | 1.80892300  | 0.70951000  |
| C | -0.69908000 | -2.75910700 | -1.25034600 |
| H | -2.41580400 | -3.93129800 | -0.83450500 |
| N | -1.45494500 | 2.05785500  | -0.23691200 |
| C | -2.84766900 | 3.77891700  | 0.45085700  |
| N | -0.03136800 | -1.55946200 | -1.29726300 |
| C | 0.14936900  | -3.83240100 | -1.71260700 |
| C | -0.78682600 | 3.25814100  | -0.29082100 |
| C | -1.64316600 | 4.33551300  | 0.14899000  |
| H | -3.74952800 | 4.26567700  | 0.80007200  |
| C | 1.21983100  | -1.85433000 | -1.78535600 |
| C | 1.34423000  | -3.27102800 | -2.04120700 |
| H | -0.15015900 | -4.87096500 | -1.77595600 |
| C | 0.50344300  | 3.43078900  | -0.77080000 |
| H | -1.34978100 | 5.37685300  | 0.19364700  |
| C | 2.21760400  | -0.92304800 | -2.02957900 |

|    |             |             |             |
|----|-------------|-------------|-------------|
| H  | 2.23214100  | -3.75030400 | -2.43392700 |
| C  | 1.30833000  | 2.42177100  | -1.28027400 |
| H  | 0.90489300  | 4.43982300  | -0.77793900 |
| C  | 2.09153100  | 0.44626600  | -1.83956700 |
| H  | 3.16187600  | -1.28840300 | -2.42189200 |
| N  | 0.98231300  | 1.08164500  | -1.32230700 |
| C  | 2.63497400  | 2.63160600  | -1.80570200 |
| C  | 3.12288000  | 1.40583300  | -2.14684500 |
| H  | 3.11576500  | 3.59770100  | -1.89429100 |
| H  | 4.08542400  | 1.15834300  | -2.57634800 |
| Fe | -0.68372500 | 0.22094000  | -0.59082400 |
| C  | 0.79022200  | -1.03455800 | 1.46108600  |
| C  | 2.17100400  | -0.74424900 | 1.56893300  |
| C  | 1.08895600  | -3.26841900 | 1.87040900  |
| C  | 3.00909600  | -1.84861100 | 1.74805000  |
| H  | 0.61880600  | -4.23653800 | 2.03066500  |
| C  | 2.47500200  | -3.12944000 | 1.88662300  |
| H  | 4.08308400  | -1.70561400 | 1.80574800  |
| H  | 3.11645600  | -3.99303000 | 2.03293300  |
| N  | 0.25941500  | -2.24649000 | 1.64665000  |
| C  | 4.57634000  | 2.35129700  | 1.40647300  |
| H  | 4.09298800  | 2.86792700  | 0.57015400  |
| H  | 4.26699000  | 2.84955000  | 2.33370000  |
| N  | -0.05998300 | 0.06054800  | 1.13375500  |
| N  | -1.26927300 | -0.04461800 | 2.19658500  |
| N  | -2.01220100 | 0.55523400  | 2.78293100  |
| C  | 2.67187100  | 0.68602800  | 1.56634800  |
| H  | 2.16928900  | 1.24451200  | 0.77638700  |
| H  | 2.33846900  | 1.15666900  | 2.50429400  |
| C  | 4.18640300  | 0.87010800  | 1.42171600  |
| H  | 4.51857900  | 0.39178700  | 0.49051400  |
| H  | 4.71433300  | 0.36660800  | 2.24303900  |
| H  | 5.66020800  | 2.47727600  | 1.30346400  |

**<sup>1</sup>TS<sub>1oss</sub>**

|   |             |            |             |
|---|-------------|------------|-------------|
| H | 0.04319700  | 5.46847700 | 0.88049600  |
| C | -0.24587400 | 4.56330100 | 0.36174400  |
| C | -1.37874200 | 4.31623800 | -0.35158800 |
| C | 0.56013200  | 3.37158100 | 0.28678700  |
| C | -1.28189500 | 2.96247200 | -0.83219900 |
| H | -2.21959700 | 4.97340900 | -0.53363000 |
| N | -0.08384800 | 2.39958700 | -0.44859900 |
| C | 1.83699100  | 3.26349400 | 0.81436900  |
| C | -2.28767400 | 2.31600300 | -1.52920000 |
| C | 2.67785500  | 2.17992800 | 0.61430500  |
| H | 2.23095700  | 4.11476200 | 1.36062600  |
| C | -2.26615100 | 0.97213300 | -1.86398300 |

|    |             |             |             |
|----|-------------|-------------|-------------|
| H  | -3.17776400 | 2.88560500  | -1.77760400 |
| N  | 2.32562400  | 1.01785400  | -0.03588200 |
| C  | 4.06690600  | 2.14571400  | 0.99526300  |
| N  | -1.22011200 | 0.11172100  | -1.62118100 |
| C  | -3.35830300 | 0.27547600  | -2.49636000 |
| C  | 3.47690300  | 0.25648500  | -0.07381500 |
| C  | 4.56614900  | 0.95926300  | 0.55359200  |
| H  | 4.58070400  | 2.94338300  | 1.51642300  |
| C  | -1.62872500 | -1.10947000 | -2.10870600 |
| C  | -2.97033800 | -1.02216100 | -2.63138600 |
| H  | -4.29225600 | 0.73645000  | -2.79177200 |
| C  | 3.57301300  | -1.02022400 | -0.60028100 |
| H  | 5.57363900  | 0.57396800  | 0.64419100  |
| C  | -0.83311700 | -2.24041900 | -2.19344100 |
| H  | -3.51438400 | -1.84912900 | -3.06981600 |
| C  | 2.51461100  | -1.72490800 | -1.15273400 |
| H  | 4.53622200  | -1.51753500 | -0.54542200 |
| C  | 0.51156100  | -2.28281700 | -1.85841600 |
| H  | -1.27646300 | -3.14044800 | -2.60782000 |
| N  | 1.23236900  | -1.24122100 | -1.31142800 |
| C  | 2.60179400  | -3.08277600 | -1.62105600 |
| C  | 1.35603200  | -3.43223700 | -2.05046800 |
| H  | 3.50514900  | -3.67921900 | -1.61185600 |
| H  | 1.02534100  | -4.37442600 | -2.46872300 |
| Fe | 0.48397000  | 0.49644000  | -0.60856500 |
| C  | -1.45449800 | -0.24426300 | 1.46330300  |
| C  | -1.93473100 | -1.40988200 | 2.12331800  |
| C  | -3.52692900 | 0.76198700  | 1.52437100  |
| C  | -3.28710000 | -1.41172900 | 2.47343600  |
| H  | -4.11549900 | 1.63972000  | 1.26078700  |
| C  | -4.10820900 | -0.32611500 | 2.16962700  |
| H  | -3.70055500 | -2.28303900 | 2.97659200  |
| H  | -5.16286000 | -0.32469400 | 2.42837100  |
| N  | -2.23418600 | 0.81012200  | 1.20051800  |
| C  | 0.36641300  | -4.53646600 | 1.58637100  |
| H  | 1.19747700  | -4.24715700 | 2.24186800  |
| H  | -0.22570300 | -5.29539400 | 2.11400100  |
| N  | -0.11419400 | -0.16294200 | 1.01521000  |
| N  | 0.81609300  | -0.29555200 | 2.29552000  |
| N  | 1.95709400  | -0.36586200 | 2.37157300  |
| C  | -1.07395900 | -2.61298600 | 2.44242700  |
| H  | -0.25183300 | -2.31575300 | 3.10551500  |
| H  | -1.67824800 | -3.33076800 | 3.01326800  |
| C  | -0.47982900 | -3.31810200 | 1.21115400  |
| H  | 0.13152600  | -2.60300800 | 0.65912500  |
| H  | -1.29442800 | -3.61467500 | 0.53741700  |
| H  | 0.79658700  | -5.00101700 | 0.69192900  |

**<sup>3</sup>TS1**

|    |             |             |             |
|----|-------------|-------------|-------------|
| H  | 0.34478600  | 5.48934500  | 0.93265400  |
| C  | -0.01578000 | 4.60316600  | 0.42593200  |
| C  | -1.20407600 | 4.41161500  | -0.21059500 |
| C  | 0.72939000  | 3.37677900  | 0.29249800  |
| C  | -1.19498000 | 3.06105900  | -0.71158100 |
| H  | -2.02654000 | 5.10550400  | -0.32946400 |
| N  | -0.00201800 | 2.44505000  | -0.41033100 |
| C  | 2.02347400  | 3.19847100  | 0.75639500  |
| C  | -2.26321100 | 2.46775500  | -1.36395600 |
| C  | 2.79158700  | 2.06406100  | 0.54036700  |
| H  | 2.48914600  | 4.02915200  | 1.27763900  |
| C  | -2.30928400 | 1.13703000  | -1.74635900 |
| H  | -3.14260700 | 3.07664500  | -1.54928800 |
| N  | 2.34871200  | 0.91518600  | -0.07707700 |
| C  | 4.18948600  | 1.95287600  | 0.87404600  |
| N  | -1.29072600 | 0.22575100  | -1.58208100 |
| C  | -3.45157700 | 0.50994200  | -2.36245400 |
| C  | 3.45146300  | 0.08777500  | -0.14443000 |
| C  | 4.60144600  | 0.73141000  | 0.43811400  |
| H  | 4.76751400  | 2.72600700  | 1.36402500  |
| C  | -1.76544000 | -0.95736800 | -2.10419400 |
| C  | -3.12010000 | -0.79369900 | -2.57118600 |
| H  | -4.37761600 | 1.01820000  | -2.59947600 |
| C  | 3.45734500  | -1.19112300 | -0.67612000 |
| H  | 5.58687200  | 0.28787700  | 0.50158400  |
| C  | -1.02602200 | -2.11957100 | -2.25194600 |
| H  | -3.71349700 | -1.57873600 | -3.02248900 |
| C  | 2.35419500  | -1.82243200 | -1.23182700 |
| H  | 4.39015500  | -1.74543700 | -0.64347700 |
| C  | 0.32051000  | -2.24390000 | -1.94125600 |
| H  | -1.52226700 | -2.98074100 | -2.68844700 |
| N  | 1.10199700  | -1.26233300 | -1.37118700 |
| C  | 2.36131800  | -3.17065800 | -1.73684400 |
| C  | 1.09644800  | -3.43459200 | -2.17149200 |
| H  | 3.22844100  | -3.81868400 | -1.74817600 |
| H  | 0.71015200  | -4.34439900 | -2.61311600 |
| Fe | 0.45097600  | 0.50558100  | -0.62477000 |
| C  | -1.43148000 | -0.25528800 | 1.52630200  |
| C  | -1.88230200 | -1.46237100 | 2.13302700  |
| C  | -3.54037200 | 0.67810200  | 1.59686700  |
| C  | -3.23645200 | -1.51765400 | 2.47163300  |
| H  | -4.15639900 | 1.54344200  | 1.35582700  |
| C  | -4.09205800 | -0.45167900 | 2.19523400  |
| H  | -3.62549700 | -2.41959000 | 2.93908900  |
| H  | -5.14878300 | -0.49547500 | 2.44122200  |

|   |             |             |            |
|---|-------------|-------------|------------|
| N | -2.24528400 | 0.78694000  | 1.30070800 |
| C | 0.50800800  | -4.50387800 | 1.51148600 |
| H | 1.33381900  | -4.20768000 | 2.17078800 |
| H | -0.06080300 | -5.29066700 | 2.02377500 |
| N | -0.10503100 | -0.06937000 | 1.08200300 |
| N | 0.89575900  | -0.36531100 | 2.32745000 |
| N | 2.02083800  | -0.26167500 | 2.43061500 |
| C | -0.99301100 | -2.65251900 | 2.41789900 |
| H | -0.18349700 | -2.35883300 | 3.09851200 |
| H | -1.58235200 | -3.40443500 | 2.95957400 |
| C | -0.37364400 | -3.30103500 | 1.16879700 |
| H | 0.21630600  | -2.55309800 | 0.63742000 |
| H | -1.17741900 | -3.60249800 | 0.48483600 |
| H | 0.94568600  | -4.93429800 | 0.60415500 |

**<sup>5</sup>TS1**

|   |             |             |             |
|---|-------------|-------------|-------------|
| H | -4.82106100 | 2.90565300  | -1.11122600 |
| C | -3.86589900 | 2.72908700  | -0.63277900 |
| C | -2.98090300 | 3.64717400  | -0.14901800 |
| C | -3.29537000 | 1.42399100  | -0.38330600 |
| C | -1.86460400 | 2.90838900  | 0.39676200  |
| H | -3.06655200 | 4.72656600  | -0.15182900 |
| N | -2.08297000 | 1.56263700  | 0.24413400  |
| C | -3.89714600 | 0.20856700  | -0.71200200 |
| C | -0.74124300 | 3.47557400  | 0.99484100  |
| C | -3.39054400 | -1.06467700 | -0.45417100 |
| H | -4.87016500 | 0.25866100  | -1.19206300 |
| C | 0.34193200  | 2.78747500  | 1.54031500  |
| H | -0.70700600 | 4.56003800  | 1.04466400  |
| N | -2.16967200 | -1.32968600 | 0.12582700  |
| C | -4.08161300 | -2.30379900 | -0.71753800 |
| N | 0.48201900  | 1.42150400  | 1.57715300  |
| C | 1.48529800  | 3.40935200  | 2.16487300  |
| C | -2.08296900 | -2.69814300 | 0.25541500  |
| C | -3.27406800 | -3.31264600 | -0.27917000 |
| H | -5.06202900 | -2.38021800 | -1.17049600 |
| C | 1.67005400  | 1.16069800  | 2.21683300  |
| C | 2.30942500  | 2.40347800  | 2.57993200  |
| H | 1.62525000  | 4.47758400  | 2.27383600  |
| C | -1.02333800 | -3.38043300 | 0.85085700  |
| H | -3.46259100 | -4.37857400 | -0.30195300 |
| C | 2.16500000  | -0.11060800 | 2.50620400  |
| H | 3.25727200  | 2.48358700  | 3.09724000  |
| C | 0.09438100  | -2.80788200 | 1.45924000  |
| H | -1.08644400 | -4.46462200 | 0.86611600  |
| C | 1.54064300  | -1.32359000 | 2.21737000  |



|    |             |             |             |
|----|-------------|-------------|-------------|
| H  | 3.11744600  | -0.16023300 | 3.02576800  |
| N  | 0.34444700  | -1.46002400 | 1.55424800  |
| C  | 1.16372600  | -3.54603400 | 2.09128900  |
| C  | 2.05913700  | -2.62783400 | 2.55867500  |
| H  | 1.21097800  | -4.62529200 | 2.16450600  |
| H  | 2.98549300  | -2.80587900 | 3.09017400  |
| Fe | -0.65484800 | 0.05562500  | 0.48121500  |
| C  | 1.29640800  | 0.77128300  | -1.64887700 |
| C  | 2.49967300  | 0.23081600  | -2.17385800 |
| C  | 2.11902800  | 2.92172300  | -1.70074900 |
| C  | 3.51248900  | 1.14312400  | -2.47830600 |
| H  | 1.93298100  | 3.97197800  | -1.48246000 |
| C  | 3.33765800  | 2.50532600  | -2.23548200 |
| H  | 4.45201800  | 0.77629100  | -2.88591600 |
| H  | 4.12277600  | 3.22291100  | -2.45429700 |
| N  | 1.11318900  | 2.08536900  | -1.44111000 |
| C  | 3.00525700  | -3.51607700 | -1.20100100 |
| H  | 2.13697800  | -3.93821000 | -1.72252600 |
| H  | 3.89868000  | -3.75523200 | -1.79217700 |
| N  | 0.22875800  | -0.04492000 | -1.22960200 |
| N  | -0.32170100 | -0.90251200 | -2.46045500 |
| N  | -1.15012800 | -1.67962700 | -2.52713800 |
| C  | 2.72043900  | -1.25334800 | -2.34834400 |
| H  | 1.89978400  | -1.69383000 | -2.92705400 |
| H  | 3.63156700  | -1.41177200 | -2.94043700 |
| C  | 2.84213700  | -2.00676700 | -1.00965400 |
| H  | 1.94982400  | -1.80685600 | -0.41289300 |
| H  | 3.69337100  | -1.60145600 | -0.44681400 |
| H  | 3.08994600  | -4.02186300 | -0.23324400 |

**<sup>1</sup>Nl<sub>css</sub>**

|   |             |             |             |
|---|-------------|-------------|-------------|
| N | 0.01655300  | 0.09620600  | 1.03166000  |
| H | -4.23213600 | 3.55567800  | 1.17523400  |
| C | -3.82546600 | 2.57387900  | 0.96777400  |
| C | -4.33624400 | 1.35559600  | 1.29380500  |
| C | -2.59224000 | 2.32850800  | 0.25627800  |
| C | -3.42042000 | 0.37101600  | 0.76630500  |
| H | -5.25255400 | 1.12511100  | 1.82248700  |
| N | -2.36228100 | 0.98094900  | 0.14221200  |
| C | -1.75813000 | 3.31903700  | -0.23621500 |
| C | -3.61803400 | -0.99999300 | 0.81509700  |
| C | -0.55139000 | 3.09001000  | -0.87987500 |
| H | -2.05671200 | 4.35208100  | -0.08628000 |
| C | -2.80495300 | -1.93361100 | 0.19192400  |
| H | -4.50267100 | -1.36734600 | 1.32607800  |
| N | 0.00430500  | 1.85380700  | -1.13833600 |
| C | 0.33920100  | 4.13951600  | -1.30483900 |

|    |             |             |             |
|----|-------------|-------------|-------------|
| N  | -1.63407700 | -1.66239000 | -0.48925300 |
| C  | -3.10582800 | -3.34077800 | 0.13129400  |
| C  | 1.25062700  | 2.11579300  | -1.67186300 |
| C  | 1.45989700  | 3.53556900  | -1.78840100 |
| H  | 0.12251300  | 5.19720400  | -1.22432500 |
| C  | -1.19106300 | -2.88378300 | -0.95804600 |
| C  | -2.11615600 | -3.92556600 | -0.59708900 |
| H  | -3.97570300 | -3.80072600 | 0.58287000  |
| C  | 2.19094300  | 1.16180700  | -2.02842200 |
| H  | 2.35534400  | 3.99266600  | -2.19004800 |
| C  | 0.00336700  | -3.11224700 | -1.61671800 |
| H  | -1.99783100 | -4.96839300 | -0.86279200 |
| C  | 1.97427700  | -0.20615200 | -1.99056200 |
| H  | 3.14278000  | 1.51393000  | -2.41335100 |
| C  | 0.96037600  | -2.13981700 | -1.85498400 |
| H  | 0.22584400  | -4.13032800 | -1.92084800 |
| N  | 0.81731200  | -0.80709700 | -1.55162000 |
| C  | 2.88253500  | -1.18813100 | -2.53280900 |
| C  | 2.24375200  | -2.38815900 | -2.46411200 |
| H  | 3.85978800  | -0.96346900 | -2.94118800 |
| H  | 2.58946800  | -3.35870900 | -2.79689400 |
| Fe | -0.67862100 | 0.06419000  | -0.51295200 |
| C  | 0.98304300  | -0.75233900 | 1.50888700  |
| C  | 1.92625400  | -0.18336800 | 2.42292300  |
| C  | 1.92589200  | -2.84583700 | 1.70571900  |
| C  | 2.92682500  | -1.02844900 | 2.90480000  |
| H  | 1.87807200  | -3.89938400 | 1.43222500  |
| C  | 2.93887900  | -2.37636100 | 2.55056400  |
| H  | 3.68121100  | -0.63030600 | 3.57938500  |
| H  | 3.69967000  | -3.05258800 | 2.92897400  |
| N  | 0.98853800  | -2.06668300 | 1.18043600  |
| C  | 2.22912600  | 2.26883500  | 1.72626200  |
| C  | 3.62781700  | 2.05214800  | 1.14492100  |
| H  | 2.15163300  | 3.28218600  | 2.14216400  |
| H  | 1.48170800  | 2.19647900  | 0.93258800  |
| C  | 1.85140900  | 1.26530700  | 2.83617400  |
| H  | 2.51027700  | 1.41648900  | 3.70203500  |
| H  | 3.85544500  | 2.81181100  | 0.38884900  |
| H  | 4.39994700  | 2.10689800  | 1.92378200  |
| H  | 3.70516700  | 1.07104200  | 0.66285600  |
| H  | 0.82466400  | 1.48261900  | 3.15449700  |

<sup>1</sup>Nl<sub>oss</sub>

|   |             |             |            |
|---|-------------|-------------|------------|
| N | -0.09561400 | -0.08273500 | 1.00316100 |
| H | 4.51627600  | -3.09064900 | 1.38175900 |
| C | 4.02946700  | -2.16296700 | 1.10838900 |
| C | 4.43629500  | -0.88690700 | 1.34696800 |

|    |             |             |             |
|----|-------------|-------------|-------------|
| C  | 2.78195600  | -2.07237900 | 0.38523200  |
| C  | 3.44095500  | -0.02104600 | 0.75974400  |
| H  | 5.32876100  | -0.54442400 | 1.85525500  |
| N  | 2.43878500  | -0.75835400 | 0.18143300  |
| C  | 2.04600400  | -3.16489100 | -0.04435800 |
| C  | 3.51141500  | 1.36274800  | 0.73506900  |
| C  | 0.84058400  | -3.09479500 | -0.72746600 |
| H  | 2.43264600  | -4.15319400 | 0.18523700  |
| C  | 2.60250600  | 2.18327100  | 0.08616100  |
| H  | 4.35672100  | 1.83742600  | 1.22354600  |
| N  | 0.19056700  | -1.93567900 | -1.09584300 |
| C  | 0.05850100  | -4.24778000 | -1.09207500 |
| N  | 1.46564300  | 1.76555000  | -0.58099800 |
| C  | 2.74241200  | 3.61176800  | -0.00965100 |
| C  | -1.01121800 | -2.34540900 | -1.63614500 |
| C  | -1.09363200 | -3.78239900 | -1.65104200 |
| H  | 0.36055900  | -5.27348500 | -0.92217800 |
| C  | 0.88374400  | 2.91834100  | -1.07167300 |
| C  | 1.68659800  | 4.06443800  | -0.74102600 |
| H  | 3.55683000  | 4.17785100  | 0.42435100  |
| C  | -2.02545700 | -1.50457700 | -2.06904100 |
| H  | -1.93397900 | -4.34568900 | -2.03653000 |
| C  | -0.32680800 | 2.99590200  | -1.73736500 |
| H  | 1.44923300  | 5.08133700  | -1.02685500 |
| C  | -1.95139600 | -0.12140000 | -2.07851200 |
| H  | -2.92858700 | -1.96509100 | -2.45706000 |
| C  | -1.16487300 | 1.91749900  | -1.96521700 |
| H  | -0.66015700 | 3.97597800  | -2.06406700 |
| N  | -0.87859100 | 0.61592000  | -1.63121000 |
| C  | -2.95138800 | 0.74087300  | -2.66222400 |
| C  | -2.45516200 | 2.00645600  | -2.60505800 |
| H  | -3.88794300 | 0.39874400  | -3.08409600 |
| H  | -2.90168400 | 2.92530700  | -2.96356400 |
| Fe | 0.69713000  | -0.05298000 | -0.56364900 |
| C  | -1.03742100 | 0.73264600  | 1.51420100  |
| C  | -1.92095200 | 0.15208300  | 2.49445200  |
| C  | -2.05856100 | 2.79564200  | 1.71300000  |
| C  | -2.90680800 | 0.97668200  | 3.03004100  |
| H  | -2.08143600 | 3.84013400  | 1.40187800  |
| C  | -2.98986700 | 2.31638100  | 2.64711900  |
| H  | -3.60582000 | 0.56913300  | 3.75688000  |
| H  | -3.74625100 | 2.97665800  | 3.06060400  |
| N  | -1.12239300 | 2.04574700  | 1.15299900  |
| C  | -2.15236100 | -2.30167800 | 1.77678500  |
| C  | -3.54663200 | -2.09719600 | 1.18011400  |
| H  | -2.06941200 | -3.31501900 | 2.19186500  |
| H  | -1.39851800 | -2.21846800 | 0.99044800  |

|   |             |             |            |
|---|-------------|-------------|------------|
| C | -1.79737900 | -1.29682700 | 2.89530500 |
| H | -2.44630800 | -1.47564200 | 3.76338300 |
| H | -3.76128500 | -2.86229600 | 0.42548400 |
| H | -4.32739700 | -2.15238600 | 1.95028000 |
| H | -3.62534400 | -1.11927400 | 0.69178400 |
| H | -0.76417400 | -1.48948400 | 3.20933000 |

<sup>3</sup>Ni

|    |             |             |             |
|----|-------------|-------------|-------------|
| N  | -0.01057200 | -0.23298100 | 0.83982500  |
| H  | 3.99111500  | 3.69555500  | 0.65530100  |
| C  | 2.94975200  | 3.42120000  | 0.54317300  |
| C  | 1.84351600  | 4.08634800  | 0.97547200  |
| C  | 2.48443000  | 2.22672600  | -0.11722500 |
| C  | 0.70481900  | 3.29926500  | 0.57332400  |
| H  | 1.78457400  | 5.02254600  | 1.51600600  |
| N  | 1.10869900  | 2.17576500  | -0.10989600 |
| C  | 3.32337400  | 1.26012700  | -0.64984500 |
| C  | -0.61188800 | 3.63335700  | 0.85004500  |
| C  | 2.90161900  | 0.08723000  | -1.25583000 |
| H  | 4.39333900  | 1.42944700  | -0.57670100 |
| C  | -1.71253600 | 2.89622000  | 0.44715500  |
| H  | -0.79458100 | 4.54998500  | 1.40229800  |
| N  | 1.59035600  | -0.29185000 | -1.43234800 |
| C  | 3.79319000  | -0.91995500 | -1.77741300 |
| N  | -1.66849200 | 1.71296000  | -0.25918500 |
| C  | -3.07886600 | 3.30170400  | 0.66565100  |
| C  | 1.64325400  | -1.52472900 | -2.03942400 |
| C  | 3.01114800  | -1.92435700 | -2.26002100 |
| H  | 4.87342100  | -0.85004700 | -1.76461900 |
| C  | -2.98252100 | 1.37738400  | -0.49577900 |
| C  | -3.86607500 | 2.36438400  | 0.07204900  |
| H  | -3.37511200 | 4.20034000  | 1.19170600  |
| C  | 0.53635800  | -2.27761000 | -2.39753800 |
| H  | 3.31345800  | -2.85163600 | -2.72982100 |
| C  | -3.40776200 | 0.25964100  | -1.19078100 |
| H  | -4.94633300 | 2.32762300  | 0.01135000  |
| C  | -0.77677200 | -1.87502800 | -2.22255100 |
| H  | 0.70923200  | -3.23940700 | -2.87021400 |
| C  | -2.56445700 | -0.71057000 | -1.70206600 |
| H  | -4.47644000 | 0.11593800  | -1.31411200 |
| N  | -1.18697800 | -0.69295600 | -1.63639700 |
| C  | -1.91481600 | -2.63465600 | -2.66987400 |
| C  | -3.02180800 | -1.90639600 | -2.35847700 |
| H  | -1.85343500 | -3.59358000 | -3.16860000 |
| H  | -4.06178600 | -2.14475500 | -2.54182000 |
| Fe | -0.05427400 | 0.60497100  | -0.64998000 |
| C  | -0.72190800 | -1.12077900 | 1.55325600  |

|   |             |             |            |
|---|-------------|-------------|------------|
| C | -0.01081500 | -1.80739900 | 2.59976000 |
| C | -2.68174000 | -2.22102700 | 2.05354000 |
| C | -0.72989000 | -2.72295700 | 3.35747100 |
| H | -3.73620700 | -2.36628500 | 1.81935000 |
| C | -2.08595800 | -2.94384600 | 3.09442700 |
| H | -0.22800400 | -3.26687200 | 4.15506700 |
| H | -2.66636600 | -3.65328700 | 3.67624300 |
| N | -2.04033400 | -1.33600600 | 1.29807800 |
| C | 2.33463200  | -2.20592800 | 1.70556900 |
| C | 3.80926900  | -1.81583600 | 1.82946800 |
| H | 1.95845800  | -1.89502400 | 0.72622800 |
| H | 2.22371800  | -3.29759700 | 1.75888700 |
| C | 1.46172300  | -1.55556600 | 2.80048500 |
| H | 1.76953300  | -1.93193200 | 3.78531200 |
| H | 4.40772900  | -2.28961800 | 1.04336000 |
| H | 3.92797200  | -0.73030200 | 1.72714900 |
| H | 4.22522100  | -2.11240500 | 2.80101500 |
| H | 1.64723500  | -0.47413800 | 2.79142900 |

**<sup>5</sup>Ni**

|   |             |             |             |
|---|-------------|-------------|-------------|
| N | -0.34625100 | -0.08843600 | -1.21394100 |
| H | 3.69794500  | 4.21329900  | -1.19340000 |
| C | 3.47746600  | 3.16892900  | -1.01085600 |
| C | 4.22292100  | 2.07693600  | -1.34717300 |
| C | 2.30357000  | 2.68038300  | -0.32401700 |
| C | 3.50692700  | 0.91647200  | -0.86837000 |
| H | 5.17546300  | 2.04781300  | -1.86138200 |
| N | 2.34301400  | 1.30958400  | -0.25657900 |
| C | 1.30118000  | 3.48610900  | 0.21663500  |
| C | 3.94790400  | -0.40220400 | -0.98683800 |
| C | 0.19200200  | 3.05510400  | 0.94388800  |
| H | 1.41056000  | 4.55850200  | 0.08223800  |
| C | 3.30827800  | -1.53378400 | -0.48250300 |
| H | 4.89347900  | -0.55907200 | -1.49786300 |
| N | -0.11817200 | 1.74472700  | 1.21608100  |
| C | -0.80360800 | 3.92266000  | 1.53169800  |
| N | 2.11031300  | -1.53150600 | 0.18638800  |
| C | 3.81504600  | -2.88564800 | -0.57143500 |
| C | -1.27696000 | 1.75547200  | 1.95169200  |
| C | -1.71226900 | 3.11848900  | 2.15612800  |
| H | -0.79284100 | 5.00395800  | 1.47524200  |
| C | 1.84254100  | -2.83356700 | 0.52537500  |
| C | 2.90792200  | -3.68973900 | 0.05271200  |
| H | 4.74755100  | -3.16703600 | -1.04459500 |
| C | -1.93760200 | 0.62024400  | 2.42156700  |
| H | -2.59376800 | 3.40940100  | 2.71367200  |
| C | 0.72210000  | -3.26564000 | 1.23163800  |

|    |             |             |             |
|----|-------------|-------------|-------------|
| H  | 2.94851400  | -4.76249300 | 0.19462000  |
| C  | -1.51110400 | -0.69868100 | 2.27405800  |
| H  | -2.85989900 | 0.78052100  | 2.97224300  |
| C  | -0.29847200 | -2.46149900 | 1.73624100  |
| H  | 0.63929100  | -4.33304800 | 1.41459400  |
| N  | -0.36536900 | -1.09434600 | 1.62561200  |
| C  | -2.19167500 | -1.85592500 | 2.80765200  |
| C  | -1.43970900 | -2.94541400 | 2.47743500  |
| H  | -3.11570500 | -1.82430500 | 3.37146800  |
| H  | -1.62536200 | -3.98520600 | 2.71628000  |
| Fe | 0.73175300  | 0.05828300  | 0.26059500  |
| C  | -1.39989100 | -0.80769200 | -1.58234000 |
| C  | -2.49895500 | -0.17359100 | -2.27253200 |
| C  | -2.46690600 | -2.86348900 | -1.63849400 |
| C  | -3.59514200 | -0.96752700 | -2.60950600 |
| H  | -2.44136400 | -3.92421800 | -1.38912800 |
| C  | -3.59579300 | -2.32341000 | -2.29221800 |
| H  | -4.44577400 | -0.52082900 | -3.11893600 |
| H  | -4.43892700 | -2.96050500 | -2.54264400 |
| N  | -1.40804500 | -2.15809500 | -1.29573300 |
| C  | -2.65938300 | 2.19806500  | -1.33932800 |
| H  | -2.61314800 | 3.24404100  | -1.66912900 |
| H  | -1.81283900 | 2.04000700  | -0.66856500 |
| C  | -2.46488600 | 1.29946500  | -2.58199000 |
| H  | -3.24569700 | 1.52472500  | -3.32082300 |
| C  | -3.97015700 | 1.94760400  | -0.59051700 |
| H  | -4.06886700 | 2.64078500  | 0.25168700  |
| H  | -4.84161100 | 2.08082300  | -1.24538900 |
| H  | -4.00587400 | 0.92932300  | -0.18652800 |
| H  | -1.49723200 | 1.54593700  | -3.03353000 |

**<sup>1</sup>TS2<sub>css</sub>**

|   |             |             |             |
|---|-------------|-------------|-------------|
| N | 0.02939900  | 0.01117500  | 1.04113900  |
| H | 4.61120100  | 2.90195700  | 0.93506500  |
| C | 3.56358300  | 2.79363700  | 0.68314500  |
| C | 2.55482300  | 3.69468100  | 0.83509700  |
| C | 2.97624000  | 1.61412300  | 0.08993300  |
| C | 1.35684300  | 3.06483400  | 0.32782500  |
| H | 2.60079100  | 4.69933700  | 1.23656000  |
| N | 1.63200200  | 1.79875200  | -0.12257000 |
| C | 3.67144800  | 0.45581100  | -0.22332400 |
| C | 0.11236900  | 3.67660000  | 0.26568900  |
| C | 3.10545400  | -0.68477800 | -0.77840100 |
| H | 4.73953600  | 0.43854000  | -0.02747900 |
| C | -1.02702200 | 3.10951600  | -0.28452100 |
| H | 0.03220400  | 4.69165500  | 0.64333000  |
| N | 1.76474900  | -0.86316300 | -1.06521400 |

|    |             |             |             |
|----|-------------|-------------|-------------|
| C  | 3.85333900  | -1.86668400 | -1.12115100 |
| N  | -1.12529400 | 1.83164000  | -0.79316100 |
| C  | -2.28382200 | 3.80461600  | -0.42371300 |
| C  | 1.66277400  | -2.14608000 | -1.56378200 |
| C  | 2.95910800  | -2.77159800 | -1.61274500 |
| H  | 4.92437800  | -1.97237900 | -1.00174100 |
| C  | -2.42385500 | 1.71010000  | -1.23621400 |
| C  | -3.14554500 | 2.94075500  | -1.02582500 |
| H  | -2.45989100 | 4.82478000  | -0.10633600 |
| C  | 0.48300900  | -2.77711200 | -1.93196600 |
| H  | 3.14392300  | -3.77552800 | -1.97402300 |
| C  | -2.98882500 | 0.56381000  | -1.77074600 |
| H  | -4.18042200 | 3.10041200  | -1.30151800 |
| C  | -0.76464000 | -2.17377400 | -1.94996200 |
| H  | 0.55153500  | -3.80536500 | -2.27445100 |
| C  | -2.32939100 | -0.64662400 | -1.91101400 |
| H  | -4.02936800 | 0.61150900  | -2.07757000 |
| N  | -1.01153000 | -0.86916400 | -1.59277300 |
| C  | -1.96419700 | -2.79924900 | -2.45848500 |
| C  | -2.93368000 | -1.84529200 | -2.44431800 |
| H  | -2.02640900 | -3.82344300 | -2.80445300 |
| H  | -3.96324700 | -1.92254700 | -2.77082600 |
| Fe | 0.26867000  | 0.40724400  | -0.69796200 |
| C  | -1.06101600 | -0.53662300 | 1.68511400  |
| C  | -0.86145100 | -1.17571400 | 2.94896500  |
| C  | -3.33666600 | -0.81215100 | 1.84714300  |
| C  | -1.97213100 | -1.65077900 | 3.62423700  |
| H  | -4.30670200 | -0.63769400 | 1.38309700  |
| C  | -3.24701500 | -1.47591800 | 3.06973400  |
| H  | -1.84744700 | -2.15398800 | 4.58064900  |
| H  | -4.13649800 | -1.84942700 | 3.56710900  |
| N  | -2.28501300 | -0.36863600 | 1.15558800  |
| C  | 1.52348500  | -1.50641700 | 2.33725400  |
| H  | 2.52026400  | -1.07074400 | 2.44193200  |
| H  | 0.98140500  | -0.43801000 | 1.52273400  |
| C  | 0.55428100  | -1.23865800 | 3.47452000  |
| H  | 0.63978600  | -2.00979600 | 4.25628900  |
| C  | 1.46767700  | -2.86011500 | 1.70461000  |
| H  | 2.18547300  | -2.96152000 | 0.89026400  |
| H  | 1.69936800  | -3.63208100 | 2.45882500  |
| H  | 0.46094100  | -3.07769300 | 1.32670700  |
| H  | 0.81250400  | -0.27604700 | 3.93916700  |

**<sup>1</sup>TS<sub>2oss</sub>**

|   |             |             |            |
|---|-------------|-------------|------------|
| N | -0.01653300 | -0.09835000 | 0.99690700 |
| H | 4.76354600  | 2.68927500  | 0.89213700 |
| C | 3.70447100  | 2.62632300  | 0.67601600 |

|    |             |             |             |
|----|-------------|-------------|-------------|
| C  | 2.72752600  | 3.53848000  | 0.93617200  |
| C  | 3.06306300  | 1.50306100  | 0.03842900  |
| C  | 1.49371500  | 2.97834500  | 0.44142500  |
| H  | 2.81749400  | 4.50944300  | 1.40673400  |
| N  | 1.71554900  | 1.73883800  | -0.11083800 |
| C  | 3.71336600  | 0.33642800  | -0.33302800 |
| C  | 0.26856800  | 3.62754000  | 0.48139600  |
| C  | 3.08670700  | -0.78076000 | -0.86470600 |
| H  | 4.78583000  | 0.28287400  | -0.17266600 |
| C  | -0.90248300 | 3.14431200  | -0.08080500 |
| H  | 0.23549000  | 4.61013400  | 0.94208200  |
| N  | 1.73316100  | -0.89870400 | -1.10523600 |
| C  | 3.76627200  | -2.00347600 | -1.20881500 |
| N  | -1.04794100 | 1.92244000  | -0.69960300 |
| C  | -2.13171900 | 3.89542500  | -0.15590000 |
| C  | 1.55229900  | -2.18157300 | -1.57398700 |
| C  | 2.81280500  | -2.87541500 | -1.64303100 |
| H  | 4.83429800  | -2.15838300 | -1.12191900 |
| C  | -2.34470800 | 1.89410500  | -1.16084600 |
| C  | -3.02063000 | 3.12631400  | -0.84165000 |
| H  | -2.27073700 | 4.88809100  | 0.25336600  |
| C  | 0.33632400  | -2.73047500 | -1.95221100 |
| H  | 2.93548100  | -3.89470500 | -1.98677000 |
| C  | -2.93922800 | 0.82241900  | -1.80401400 |
| H  | -4.04586100 | 3.35100400  | -1.10705900 |
| C  | -0.85747300 | -2.03000800 | -2.01544400 |
| H  | 0.33143900  | -3.76543500 | -2.27994100 |
| C  | -2.32646100 | -0.40281800 | -2.00261000 |
| H  | -3.97249900 | 0.92947300  | -2.11894300 |
| N  | -1.02379000 | -0.70574600 | -1.67318900 |
| C  | -2.08174500 | -2.57033800 | -2.55300600 |
| C  | -2.98737000 | -1.55465600 | -2.56136000 |
| H  | -2.20468300 | -3.58970400 | -2.89650000 |
| H  | -4.01382900 | -1.56660100 | -2.90533100 |
| Fe | 0.28532000  | 0.43716000  | -0.69047300 |
| C  | -1.12981400 | -0.60869300 | 1.61935400  |
| C  | -0.95834600 | -1.25488300 | 2.88766000  |
| C  | -3.40954000 | -0.91797300 | 1.70838300  |
| C  | -2.08900900 | -1.75442500 | 3.51445100  |
| H  | -4.36725500 | -0.75277800 | 1.21506400  |
| C  | -3.34932100 | -1.59322700 | 2.92554500  |
| H  | -1.98818900 | -2.26378000 | 4.47089300  |
| H  | -4.24897400 | -1.97712400 | 3.39615500  |
| N  | -2.34356200 | -0.44571000 | 1.05869700  |
| C  | 1.48560300  | -1.53525500 | 2.42134300  |
| H  | 2.46287300  | -1.10168100 | 2.65034700  |
| H  | 0.97851200  | -0.70064500 | 1.53368100  |



|   |            |             |            |
|---|------------|-------------|------------|
| C | 0.42674700 | -1.30939000 | 3.49442500 |
| H | 0.47071300 | -2.09004000 | 4.26871600 |
| C | 1.53791600 | -2.91649900 | 1.81549600 |
| H | 2.28535400 | -2.97960800 | 1.02130600 |
| H | 1.79242100 | -3.66525900 | 2.58250400 |
| H | 0.56443400 | -3.19619500 | 1.39551700 |
| H | 0.63241000 | -0.35122600 | 3.99367500 |

**<sup>3</sup>TS2**

|    |             |             |             |
|----|-------------|-------------|-------------|
| N  | -0.00346500 | -0.13439200 | 0.91055200  |
| H  | 4.49934900  | 3.12127400  | 0.46847200  |
| C  | 3.44930100  | 2.94177200  | 0.27469500  |
| C  | 2.39693600  | 3.79024000  | 0.43902900  |
| C  | 2.90737600  | 1.69873600  | -0.21564500 |
| C  | 1.21541800  | 3.07000500  | 0.03272800  |
| H  | 2.40273900  | 4.81399100  | 0.79145400  |
| N  | 1.54289300  | 1.79769400  | -0.37489100 |
| C  | 3.65859200  | 0.55492200  | -0.44016200 |
| C  | -0.06409500 | 3.60714600  | 0.02825300  |
| C  | 3.13522500  | -0.67255900 | -0.81889600 |
| H  | 4.72995600  | 0.61567200  | -0.27459200 |
| C  | -1.19406400 | 2.95739700  | -0.44179300 |
| H  | -0.18075800 | 4.62939900  | 0.37498400  |
| N  | 1.80268200  | -0.92877100 | -1.05512400 |
| C  | 3.91485300  | -1.87562300 | -0.97492600 |
| N  | -1.23280300 | 1.66525200  | -0.91826800 |
| C  | -2.49074400 | 3.57735200  | -0.56583900 |
| C  | 1.72938800  | -2.27269700 | -1.33882300 |
| C  | 3.03967200  | -2.87218700 | -1.28806100 |
| H  | 4.98923300  | -1.93292400 | -0.85349100 |
| C  | -2.52607300 | 1.46674900  | -1.34535900 |
| C  | -3.31238100 | 2.65743200  | -1.14072500 |
| H  | -2.71762700 | 4.59209400  | -0.26413300 |
| C  | 0.56720600  | -2.95570800 | -1.66710300 |
| H  | 3.24654100  | -3.91729000 | -1.48087600 |
| C  | -3.01945300 | 0.28579200  | -1.87316800 |
| H  | -4.35802000 | 2.75539000  | -1.40363000 |
| C  | -0.67624300 | -2.36679400 | -1.82980000 |
| H  | 0.64756500  | -4.02079900 | -1.86172400 |
| C  | -2.29073200 | -0.88715100 | -1.97283600 |
| H  | -4.06178000 | 0.26180900  | -2.17518200 |
| N  | -0.96294300 | -1.03172400 | -1.63682100 |
| C  | -1.84538100 | -3.06857500 | -2.29779100 |
| C  | -2.84142200 | -2.14698200 | -2.40245200 |
| H  | -1.87546100 | -4.12615800 | -2.52763300 |
| H  | -3.86372900 | -2.29057200 | -2.72858600 |
| Fe | 0.22785700  | 0.31869800  | -0.79500000 |

|   |             |             |            |
|---|-------------|-------------|------------|
| C | -1.05895400 | -0.48516800 | 1.70387700 |
| C | -0.81334800 | -0.75408000 | 3.09189000 |
| C | -3.30077800 | -0.94571200 | 1.94889000 |
| C | -1.89020900 | -1.15884100 | 3.86517900 |
| H | -4.27536300 | -0.99748600 | 1.46386400 |
| C | -3.16686000 | -1.26342800 | 3.29934300 |
| H | -1.73507400 | -1.38437800 | 4.91851200 |
| H | -4.02408500 | -1.57644000 | 3.88691000 |
| N | -2.29047000 | -0.57475600 | 1.16034200 |
| C | 1.65467700  | -0.86313900 | 2.63481500 |
| H | 2.56282100  | -0.26090600 | 2.71480500 |
| H | 1.04105500  | -0.37610700 | 1.56517800 |
| C | 0.57643900  | -0.53214000 | 3.65594500 |
| H | 0.70489500  | -1.12481000 | 4.57449500 |
| C | 1.88660000  | -2.32440900 | 2.33163100 |
| H | 2.58598400  | -2.45462300 | 1.50076000 |
| H | 2.29938100  | -2.84450300 | 3.21030100 |
| H | 0.94524700  | -2.82020600 | 2.06683900 |
| H | 0.67591300  | 0.52420400  | 3.94537500 |

**<sup>5</sup>TS2**

|   |             |             |             |
|---|-------------|-------------|-------------|
| N | -0.20792500 | -0.30556600 | 1.08558200  |
| H | 4.97684400  | 1.95405300  | 1.42675800  |
| C | 3.94182200  | 2.07322500  | 1.13193800  |
| C | 3.10152100  | 3.11523200  | 1.38222500  |
| C | 3.19291600  | 1.10875700  | 0.36439900  |
| C | 1.83978000  | 2.78878900  | 0.76548300  |
| H | 3.30205000  | 4.03017200  | 1.92513200  |
| N | 1.91246400  | 1.56092000  | 0.14830300  |
| C | 3.70972200  | -0.09506100 | -0.09319700 |
| C | 0.72396300  | 3.61236200  | 0.78946500  |
| C | 3.00513400  | -1.02755300 | -0.84161200 |
| H | 4.74716400  | -0.31678700 | 0.13712200  |
| C | -0.48599500 | 3.32606500  | 0.17466000  |
| H | 0.80858600  | 4.55784800  | 1.31606900  |
| N | 1.67895200  | -0.92654900 | -1.20102600 |
| C | 3.56636800  | -2.25289600 | -1.34887800 |
| N | -0.77241300 | 2.17802900  | -0.52837900 |
| C | -1.62581700 | 4.20783300  | 0.17856400  |
| C | 1.39551300  | -2.06948900 | -1.91685100 |
| C | 2.56685200  | -2.90025900 | -2.01443800 |
| H | 4.59398300  | -2.56334900 | -1.20753300 |
| C | -2.07033100 | 2.31616300  | -0.95887500 |
| C | -2.60770700 | 3.58210800  | -0.52850600 |
| H | -1.65250300 | 5.17655200  | 0.66120000  |
| C | 0.16279400  | -2.38724400 | -2.46924300 |
| H | 2.60524100  | -3.85103200 | -2.53074900 |

|    |             |             |             |
|----|-------------|-------------|-------------|
| C  | -2.77886700 | 1.37816500  | -1.69372500 |
| H  | -3.61010700 | 3.92942300  | -0.74468400 |
| C  | -0.95283000 | -1.56486400 | -2.43655500 |
| H  | 0.07350500  | -3.33706300 | -2.98702100 |
| C  | -2.28098100 | 0.14945800  | -2.09595500 |
| H  | -3.80275500 | 1.61824500  | -1.96213200 |
| N  | -1.01211400 | -0.32050100 | -1.84955100 |
| C  | -2.21357900 | -1.88538200 | -3.05784300 |
| C  | -3.03507100 | -0.81966600 | -2.85044500 |
| H  | -2.42062700 | -2.80619000 | -3.58824400 |
| H  | -4.05995300 | -0.68426400 | -3.17206800 |
| Fe | 0.36952200  | 0.51963200  | -0.65503000 |
| C  | -1.33150800 | -0.79505000 | 1.65728400  |
| C  | -1.25113300 | -1.64328200 | 2.81440300  |
| C  | -3.63333000 | -0.92542300 | 1.65262700  |
| C  | -2.43610600 | -2.13408800 | 3.34084500  |
| H  | -4.56531800 | -0.61791300 | 1.17813500  |
| C  | -3.65916000 | -1.77925300 | 2.76023300  |
| H  | -2.40782900 | -2.78966300 | 4.20925100  |
| H  | -4.60091800 | -2.15063700 | 3.15215900  |
| N  | -2.52234500 | -0.44472900 | 1.10059600  |
| C  | 1.18855300  | -1.98965400 | 2.34379400  |
| H  | 2.18052400  | -1.67174300 | 2.67507500  |
| H  | 0.75729100  | -1.01150500 | 1.59341100  |
| C  | 0.11022900  | -1.91351300 | 3.41970300  |
| H  | 0.07980600  | -2.83729400 | 4.01718700  |
| C  | 1.18384900  | -3.23365800 | 1.48493700  |
| H  | 1.93894800  | -3.18168700 | 0.69723200  |
| H  | 1.38901100  | -4.12732200 | 2.09497300  |
| H  | 0.20541500  | -3.37595800 | 1.01114100  |
| H  | 0.35810900  | -1.09646200 | 4.11306800  |

<sup>1</sup>H<sub>loss</sub>

|   |             |             |             |
|---|-------------|-------------|-------------|
| N | 0.08300100  | -0.20732600 | 0.94400500  |
| H | 4.53976600  | 3.05542000  | 1.07295100  |
| C | 3.48683900  | 2.92191600  | 0.85903200  |
| C | 2.44198700  | 3.72884000  | 1.19257400  |
| C | 2.93206400  | 1.79893700  | 0.14546900  |
| C | 1.25157100  | 3.10624100  | 0.66868200  |
| H | 2.45812100  | 4.66638200  | 1.73385600  |
| N | 1.56624200  | 1.93304100  | 0.02169200  |
| C | 3.67049300  | 0.71345700  | -0.30031900 |
| C | -0.02265500 | 3.64374400  | 0.77545800  |
| C | 3.13207600  | -0.41140500 | -0.90679500 |
| H | 4.74284300  | 0.72967300  | -0.13127000 |
| C | -1.15993600 | 3.10684600  | 0.19412500  |
| H | -0.12885900 | 4.57995100  | 1.31493900  |

|                      |             |             |             |
|----------------------|-------------|-------------|-------------|
| N                    | 1.79485100  | -0.60024300 | -1.18577300 |
| C                    | 3.89606600  | -1.57000900 | -1.29465300 |
| N                    | -1.21104400 | 1.93386400  | -0.52662100 |
| C                    | -2.45178100 | 3.74858900  | 0.20478900  |
| C                    | 1.70544600  | -1.86587700 | -1.72078100 |
| C                    | 3.00930000  | -2.47586300 | -1.79390500 |
| H                    | 4.96969200  | -1.66198800 | -1.18965000 |
| C                    | -2.51112400 | 1.83005800  | -0.96827500 |
| C                    | -3.28548700 | 2.96400700  | -0.53064800 |
| H                    | -2.66795900 | 4.68582400  | 0.70183000  |
| C                    | 0.53508600  | -2.46993800 | -2.15496900 |
| H                    | 3.20353400  | -3.46555300 | -2.18771400 |
| C                    | -3.02385000 | 0.77180300  | -1.69806000 |
| H                    | -4.33259500 | 3.11753900  | -0.75877600 |
| C                    | -0.70831500 | -1.85920700 | -2.17755900 |
| H                    | 0.60680500  | -3.47939400 | -2.54802400 |
| C                    | -2.31029400 | -0.37079600 | -2.01701800 |
| H                    | -4.06928700 | 0.81407000  | -1.98723000 |
| N                    | -0.98018400 | -0.58426000 | -1.73037000 |
| C                    | -1.89008200 | -2.45588300 | -2.74969600 |
| C                    | -2.87923400 | -1.52513700 | -2.66508600 |
| H                    | -1.93200500 | -3.45134100 | -3.17338400 |
| H                    | -3.90688000 | -1.59835400 | -2.99770100 |
| Fe                   | 0.24411400  | 0.58419000  | -0.67708000 |
| C                    | -0.97247500 | -0.81273300 | 1.56967900  |
| C                    | -0.74113200 | -1.62063100 | 2.73109900  |
| C                    | -3.24114500 | -1.20825600 | 1.67164200  |
| C                    | -1.84615900 | -2.22345500 | 3.31620500  |
| H                    | -4.21544100 | -1.01319500 | 1.22339100  |
| C                    | -3.12875100 | -2.03013300 | 2.79010400  |
| H                    | -1.70370400 | -2.85073200 | 4.19422100  |
| H                    | -4.00225000 | -2.49664400 | 3.23433900  |
| N                    | -2.20785000 | -0.61412400 | 1.07439700  |
| C                    | 1.68693500  | -2.33626700 | 2.37498000  |
| C                    | 1.37771700  | -3.44761400 | 1.42911500  |
| H                    | 2.72830800  | -2.10962100 | 2.59405700  |
| H                    | 0.98978400  | -0.46700200 | 1.32484300  |
| C                    | 0.64990900  | -1.78116800 | 3.31521100  |
| H                    | 0.57022200  | -2.43182700 | 4.20584200  |
| H                    | 2.19342200  | -3.60115100 | 0.71624500  |
| H                    | 1.21196500  | -4.40283900 | 1.96051900  |
| H                    | 0.46322700  | -3.24511000 | 0.85803600  |
| H                    | 1.00080900  | -0.81013200 | 3.69906500  |
| <b><sup>3</sup>M</b> |             |             |             |
| N                    | 0.08424100  | -0.21624300 | 0.93021200  |
| H                    | 4.49917600  | 3.10935600  | 1.00229100  |

|    |             |             |             |
|----|-------------|-------------|-------------|
| C  | 3.44738800  | 2.95841000  | 0.79443700  |
| C  | 2.39242400  | 3.75367900  | 1.12435900  |
| C  | 2.90590400  | 1.81973600  | 0.09580700  |
| C  | 1.20886500  | 3.10862100  | 0.61246700  |
| H  | 2.39745700  | 4.69702700  | 1.65568400  |
| N  | 1.53772900  | 1.93317100  | -0.02363100 |
| C  | 3.65822500  | 0.73927600  | -0.33921400 |
| C  | -0.07256100 | 3.62890200  | 0.71955700  |
| C  | 3.13344100  | -0.40221100 | -0.92621200 |
| H  | 4.73095800  | 0.77357400  | -0.17532800 |
| C  | -1.20447400 | 3.06998000  | 0.14848200  |
| H  | -0.18972400 | 4.56925800  | 1.24947200  |
| N  | 1.79796600  | -0.61402100 | -1.19531300 |
| C  | 3.91169700  | -1.55667200 | -1.29877500 |
| N  | -1.24142100 | 1.88887800  | -0.55948200 |
| C  | -2.50496800 | 3.69427400  | 0.15517500  |
| C  | 1.72343600  | -1.88884100 | -1.70977900 |
| C  | 3.03504600  | -2.48288300 | -1.77818800 |
| H  | 4.98697700  | -1.63227300 | -1.19753200 |
| C  | -2.54033000 | 1.76332900  | -0.99856500 |
| C  | -3.32920700 | 2.89118800  | -0.57091600 |
| H  | -2.73291000 | 4.63366600  | 0.64279900  |
| C  | 0.55941200  | -2.51313200 | -2.13268300 |
| H  | 3.24093000  | -3.47641900 | -2.15603100 |
| C  | -3.03899400 | 0.69158500  | -1.71854000 |
| H  | -4.37858100 | 3.02850300  | -0.79896600 |
| C  | -0.69067100 | -1.91632000 | -2.16545200 |
| H  | 0.64221900  | -3.52749900 | -2.51066000 |
| C  | -2.31053300 | -0.44472400 | -2.02610400 |
| H  | -4.08502700 | 0.71702500  | -2.00751800 |
| N  | -0.97766700 | -0.63799000 | -1.73746100 |
| C  | -1.86502900 | -2.53464600 | -2.72949000 |
| C  | -2.86514500 | -1.61443200 | -2.65853400 |
| H  | -1.89522300 | -3.53653800 | -3.13876700 |
| H  | -3.89178800 | -1.70473200 | -2.99005400 |
| Fe | 0.23101000  | 0.55829700  | -0.70037600 |
| C  | -0.96363500 | -0.80029700 | 1.58530100  |
| C  | -0.72574500 | -1.53893400 | 2.79186900  |
| C  | -3.22508600 | -1.23800400 | 1.69137700  |
| C  | -1.82354100 | -2.13626300 | 3.39684100  |
| H  | -4.19957300 | -1.08622400 | 1.22699800  |
| C  | -3.10495700 | -1.99931000 | 2.85140800  |
| H  | -1.67639500 | -2.71263100 | 4.30834400  |
| H  | -3.97217100 | -2.46087000 | 3.31278300  |
| N  | -2.19951400 | -0.65481400 | 1.07140200  |
| C  | 1.74775700  | -2.13839900 | 2.50583700  |
| C  | 1.52291600  | -3.26667200 | 1.55577300  |

|   |            |             |            |
|---|------------|-------------|------------|
| H | 2.76854300 | -1.84793700 | 2.74459600 |
| H | 0.99502800 | -0.44647600 | 1.32401000 |
| C | 0.65785800 | -1.62718000 | 3.40934600 |
| H | 0.58691400 | -2.27065400 | 4.30582700 |
| H | 2.37459000 | -3.39543400 | 0.88108700 |
| H | 1.36595100 | -4.22301000 | 2.08728800 |
| H | 0.62932600 | -3.10114000 | 0.94103000 |
| H | 0.95076200 | -0.63553200 | 3.78883900 |

**<sup>5</sup>M**

|   |             |             |             |
|---|-------------|-------------|-------------|
| N | 0.27489000  | 0.09502700  | 1.09022500  |
| H | -1.47676600 | 5.16931800  | 0.18224100  |
| C | -1.70470300 | 4.11217100  | 0.23393500  |
| C | -2.75533900 | 3.50178700  | 0.85159000  |
| C | -0.92670200 | 3.07743600  | -0.40187100 |
| C | -2.63234600 | 2.08754700  | 0.59760000  |
| H | -3.56516400 | 3.95683100  | 1.40767200  |
| N | -1.49827400 | 1.84754100  | -0.14822200 |
| C | 0.18229900  | 3.31755300  | -1.20919200 |
| C | -3.57925400 | 1.13755800  | 0.97210000  |
| C | 0.93413400  | 2.35215200  | -1.87036600 |
| H | 0.48523400  | 4.35347000  | -1.32864800 |
| C | -3.53357100 | -0.21925800 | 0.67134800  |
| H | -4.43503700 | 1.49412200  | 1.53739800  |
| N | 0.70940600  | 1.00286000  | -1.78257000 |
| C | 2.11916400  | 2.60423200  | -2.65826200 |
| N | -2.50790500 | -0.83286200 | -0.00099000 |
| C | -4.50995400 | -1.20256200 | 1.08078100  |
| C | 1.74215900  | 0.39148000  | -2.44131800 |
| C | 2.62440300  | 1.38639300  | -3.00799900 |
| H | 2.51268100  | 3.58623200  | -2.88899700 |
| C | -2.77454200 | -2.17551800 | 0.01967400  |
| C | -4.03955300 | -2.41653100 | 0.67507000  |
| H | -5.42284100 | -0.98117900 | 1.61924500  |
| C | 1.92939300  | -0.98722800 | -2.49654000 |
| H | 3.51424400  | 1.16876800  | -3.58513300 |
| C | -1.90703000 | -3.15755100 | -0.44998600 |
| H | -4.48772600 | -3.39209700 | 0.81518700  |
| C | 1.07664600  | -1.94504000 | -1.96018300 |
| H | 2.81005700  | -1.35034000 | -3.01754900 |
| C | -0.66815300 | -2.93203800 | -1.03650800 |
| H | -2.21978200 | -4.19161900 | -0.34224500 |
| N | -0.10720800 | -1.70266800 | -1.29995100 |
| C | 1.27171200  | -3.36801300 | -2.10005300 |
| C | 0.19400200  | -3.97627900 | -1.53401400 |
| H | 2.11922800  | -3.82381600 | -2.59599600 |
| H | -0.02524800 | -5.03438900 | -1.46870900 |

|    |             |             |             |
|----|-------------|-------------|-------------|
| Fe | -0.69668200 | 0.03863500  | -0.53760900 |
| C  | 1.26723500  | -0.68679000 | 1.61890700  |
| C  | 2.17527300  | -0.15288100 | 2.59327900  |
| C  | 2.30575200  | -2.74924900 | 1.71225900  |
| C  | 3.15826100  | -1.00108000 | 3.08784400  |
| H  | 2.32123900  | -3.77186100 | 1.33534300  |
| C  | 3.24534700  | -2.32643500 | 2.65093400  |
| H  | 3.86551900  | -0.61984700 | 3.82228000  |
| H  | 4.00924600  | -3.00103400 | 3.02444800  |
| N  | 1.34824300  | -1.97039800 | 1.21172200  |
| C  | 2.13373500  | 2.32790400  | 2.00841900  |
| C  | 3.06657400  | 2.18498500  | 0.85282700  |
| H  | 1.61791200  | 3.27030700  | 2.17335200  |
| H  | 0.31643200  | 1.04982200  | 1.43942100  |
| C  | 2.05622200  | 1.27887700  | 3.08372400  |
| H  | 2.85783000  | 1.44739600  | 3.82651600  |
| H  | 3.05587100  | 3.06936300  | 0.21036600  |
| H  | 4.10440200  | 2.01407200  | 1.18590300  |
| H  | 2.79996800  | 1.32091700  | 0.22751600  |
| H  | 1.11539500  | 1.40282600  | 3.64274100  |

**PC**

|   |             |             |             |
|---|-------------|-------------|-------------|
| C | -0.22101500 | 0.77010600  | -0.19953500 |
| C | -0.21134600 | -0.64031900 | -0.27139900 |
| C | -2.41128800 | -0.79689400 | 0.21463800  |
| C | -2.54757500 | 0.58561400  | 0.30670900  |
| C | -1.41459800 | 1.39592400  | 0.09556100  |
| C | 2.03571900  | -0.02307400 | -0.34264300 |
| H | -3.27237300 | -1.44180600 | 0.38207400  |
| H | -3.51097800 | 1.02439200  | 0.54576500  |
| H | -1.48189000 | 2.47886700  | 0.17097900  |
| H | 2.82560200  | -0.06022300 | -1.10050300 |
| H | 1.28903200  | -2.03978100 | -0.30557600 |
| N | -1.25694200 | -1.43537700 | -0.06742700 |
| N | 1.05646500  | -1.09858700 | -0.60058900 |
| C | 2.65873600  | -0.13403800 | 1.05423100  |
| H | 3.17830000  | -1.09169500 | 1.17891800  |
| H | 3.38637500  | 0.66926800  | 1.22022400  |
| H | 1.88182900  | -0.06220400 | 1.82464100  |
| C | 1.17161500  | 1.26730500  | -0.50248400 |
| H | 1.23321300  | 1.64404300  | -1.53240700 |
| H | 1.51274600  | 2.06914800  | 0.16152700  |

**<sup>3</sup>Nl'**

|   |            |             |             |
|---|------------|-------------|-------------|
| N | 0.31193300 | -0.07336100 | -0.76526800 |
| H | 5.07888300 | 2.22823900  | -2.48039100 |
| C | 4.56585900 | 1.47108600  | -1.90099100 |

|    |             |             |             |
|----|-------------|-------------|-------------|
| C  | 4.86399400  | 0.14973800  | -1.77435800 |
| C  | 3.40206600  | 1.71516000  | -1.08307600 |
| C  | 3.88081200  | -0.41116200 | -0.88028400 |
| H  | 5.67276800  | -0.40889900 | -2.22800800 |
| N  | 2.99664300  | 0.55413200  | -0.46439600 |
| C  | 2.80434100  | 2.95560700  | -0.93446800 |
| C  | 3.84336200  | -1.73829000 | -0.48442300 |
| C  | 1.70989700  | 3.21888200  | -0.12437800 |
| H  | 3.23060600  | 3.78734300  | -1.48712700 |
| C  | 2.91127400  | -2.26879000 | 0.38978200  |
| H  | 4.59485200  | -2.40964200 | -0.88782500 |
| N  | 1.04326800  | 2.28907700  | 0.64087700  |
| C  | 1.10331300  | 4.51904600  | 0.01386400  |
| N  | 1.88655800  | -1.57263400 | 1.00015700  |
| C  | 2.88057700  | -3.65361400 | 0.77897300  |
| C  | 0.00844000  | 2.97894700  | 1.23268900  |
| C  | 0.04603800  | 4.37003700  | 0.85889600  |
| H  | 1.45330200  | 5.41683100  | -0.47983400 |
| C  | 1.19013400  | -2.51571600 | 1.72901200  |
| C  | 1.81534700  | -3.80582700 | 1.61099300  |
| H  | 3.59211500  | -4.39859400 | 0.44626100  |
| C  | -0.96534500 | 2.41960800  | 2.04627900  |
| H  | -0.65606700 | 5.11858400  | 1.20356900  |
| C  | 0.03675600  | -2.28847600 | 2.45735600  |
| H  | 1.46506500  | -4.70301600 | 2.10533700  |
| C  | -1.03569800 | 1.07986100  | 2.38815700  |
| H  | -1.73141900 | 3.07938400  | 2.44131200  |
| C  | -0.59248900 | -1.05947500 | 2.56838500  |
| H  | -0.40294900 | -3.13157000 | 2.98073700  |
| N  | -0.16127300 | 0.10000600  | 1.96612800  |
| C  | -2.03955300 | 0.51879200  | 3.25774500  |
| C  | -1.76501100 | -0.80960800 | 3.36957100  |
| H  | -2.84164500 | 1.08484000  | 3.71327100  |
| H  | -2.28891400 | -1.56280600 | 3.94415900  |
| Fe | 1.30326500  | 0.26860600  | 0.59047300  |
| C  | -0.32243800 | -1.09015300 | -1.36878000 |
| C  | -1.30814300 | -0.72670200 | -2.35372300 |
| C  | -0.73629000 | -3.33823100 | -1.67815100 |
| C  | -2.00494300 | -1.76135800 | -2.96565400 |
| H  | -0.48674300 | -4.36121800 | -1.39732600 |
| C  | -1.72664600 | -3.09091100 | -2.63767500 |
| H  | -2.77541100 | -1.52476900 | -3.69559700 |
| H  | -2.26120100 | -3.91229400 | -3.10454900 |
| N  | -0.05120600 | -2.38801200 | -1.05494000 |
| C  | -2.25321800 | 1.49796000  | -1.48276900 |
| H  | -2.48218700 | 2.51176400  | -1.83476300 |
| H  | -1.51319300 | 1.59215900  | -0.68442900 |



|   |             |             |             |
|---|-------------|-------------|-------------|
| C | -1.60052600 | 0.72076400  | -2.66042100 |
| H | -2.26513200 | 0.76916700  | -3.53192400 |
| H | -0.66861100 | 1.23598600  | -2.92474400 |
| C | -3.50233700 | 0.83248900  | -0.95469700 |
| C | -4.76196100 | 1.11449100  | -1.49923100 |
| C | -3.41615800 | -0.12269800 | 0.06856700  |
| C | -5.90711700 | 0.46348800  | -1.03520600 |
| H | -4.84548200 | 1.85536900  | -2.29238400 |
| C | -4.55743100 | -0.77301500 | 0.53800100  |
| H | -2.44740400 | -0.35558900 | 0.49753700  |
| C | -5.80803300 | -0.48342700 | -0.01295100 |
| H | -6.87641500 | 0.69942400  | -1.46772000 |
| H | -4.46567300 | -1.50206300 | 1.33906800  |
| H | -6.69874500 | -0.98786400 | 0.35296100  |

**<sup>5</sup>Ni'**

|   |             |             |             |
|---|-------------|-------------|-------------|
| N | 0.30698700  | -0.18783700 | -1.17229900 |
| H | 5.07356800  | 3.18372700  | -1.96036100 |
| C | 4.64711100  | 2.28361200  | -1.53546800 |
| C | 5.16041100  | 1.01932200  | -1.54603200 |
| C | 3.39411700  | 2.22236000  | -0.81898200 |
| C | 4.22193100  | 0.17872900  | -0.83906700 |
| H | 6.09103700  | 0.67738200  | -1.98144000 |
| N | 3.15848900  | 0.93286200  | -0.40875600 |
| C | 2.56522300  | 3.31493900  | -0.56186500 |
| C | 4.38061200  | -1.19084800 | -0.62110700 |
| C | 1.39212900  | 3.30499700  | 0.19296000  |
| H | 2.88596900  | 4.27501100  | -0.95612900 |
| C | 3.51246700  | -2.02182000 | 0.08503500  |
| H | 5.27390300  | -1.65124300 | -1.03337900 |
| N | 0.83658900  | 2.19324500  | 0.77414500  |
| C | 0.60316500  | 4.47271100  | 0.51903500  |
| N | 2.34394000  | -1.62004500 | 0.68019100  |
| C | 3.70986700  | -3.43845300 | 0.30500000  |
| C | -0.26735000 | 2.61928100  | 1.46767900  |
| C | -0.42282800 | 4.04843500  | 1.31145900  |
| H | 0.82552800  | 5.48102600  | 0.19261000  |
| C | 1.79076500  | -2.73138200 | 1.25914100  |
| C | 2.64282900  | -3.87761300 | 1.03047600  |
| H | 4.56011600  | -4.00725200 | -0.05016100 |
| C | -1.11330000 | 1.79483000  | 2.21013200  |
| H | -1.21153400 | 4.63801100  | 1.76183900  |
| C | 0.59592000  | -2.75032400 | 1.97550800  |
| H | 2.44276700  | -4.87919900 | 1.39024500  |
| C | -0.97688800 | 0.41907500  | 2.38622400  |
| H | -1.95773800 | 2.26908300  | 2.70107600  |
| C | -0.21565300 | -1.65141300 | 2.25725000  |

|    |             |             |             |
|----|-------------|-------------|-------------|
| H  | 0.28040700  | -3.70733500 | 2.38080200  |
| N  | 0.01176700  | -0.36311900 | 1.83270700  |
| C  | -1.86182200 | -0.40536200 | 3.17485200  |
| C  | -1.39580700 | -1.68557100 | 3.08944000  |
| H  | -2.72749300 | -0.04056900 | 3.71267300  |
| H  | -1.79511300 | -2.57618800 | 3.55847800  |
| Fe | 1.33081600  | 0.18512200  | 0.29447100  |
| C  | -0.55532500 | -1.08581200 | -1.62834300 |
| C  | -1.70982200 | -0.64840900 | -2.37721200 |
| C  | -1.19072400 | -3.30274800 | -1.82592700 |
| C  | -2.59708200 | -1.62162200 | -2.83212200 |
| H  | -0.97981400 | -4.34815700 | -1.60075400 |
| C  | -2.34599300 | -2.96479700 | -2.56373400 |
| H  | -3.48841200 | -1.32460400 | -3.37879300 |
| H  | -3.02362100 | -3.74268600 | -2.90275300 |
| N  | -0.32117900 | -2.42186600 | -1.37128900 |
| C  | -2.42396000 | 1.53196000  | -1.27556300 |
| H  | -2.58173000 | 2.59235800  | -1.50668000 |
| H  | -1.59935200 | 1.47837700  | -0.56131200 |
| C  | -1.96832800 | 0.81908700  | -2.58058900 |
| H  | -2.73760000 | 0.94915800  | -3.35157600 |
| H  | -1.05119500 | 1.30826200  | -2.92611000 |
| C  | -3.67624700 | 0.93349700  | -0.67877500 |
| C  | -4.94504900 | 1.43012900  | -1.00457300 |
| C  | -3.59350500 | -0.16782300 | 0.18620400  |
| C  | -6.10122400 | 0.84783700  | -0.47985700 |
| H  | -5.02651800 | 2.28571800  | -1.67241900 |
| C  | -4.74468600 | -0.75094800 | 0.71579000  |
| H  | -2.61977200 | -0.56685500 | 0.45030100  |
| C  | -6.00420600 | -0.24553600 | 0.38397000  |
| H  | -7.07636000 | 1.25146800  | -0.74104900 |
| H  | -4.65239500 | -1.59651800 | 1.39259900  |
| H  | -6.90248400 | -0.69676700 | 0.79752600  |

**<sup>3</sup>TS<sub>2sp3</sub>'**

|   |             |             |             |
|---|-------------|-------------|-------------|
| N | -0.16759300 | -0.19218100 | 1.13179900  |
| H | 4.38032300  | 3.08329100  | 0.98586000  |
| C | 3.34352000  | 2.89655600  | 0.73570100  |
| C | 2.27425900  | 3.73079300  | 0.86368800  |
| C | 2.84201600  | 1.65914800  | 0.19237400  |
| C | 1.12444700  | 3.00972200  | 0.37755900  |
| H | 2.25109900  | 4.74740100  | 1.23556500  |
| N | 1.48653300  | 1.74732900  | -0.03346600 |
| C | 3.61765000  | 0.53041400  | -0.02863000 |
| C | -0.15391700 | 3.54216800  | 0.28986400  |
| C | 3.12326300  | -0.69724100 | -0.44122300 |
| H | 4.68218400  | 0.60310900  | 0.17267500  |

|    |             |             |             |
|----|-------------|-------------|-------------|
| C  | -1.23851400 | 2.89955100  | -0.28548800 |
| H  | -0.30085400 | 4.55844500  | 0.64255800  |
| N  | 1.79841000  | -0.97035800 | -0.70499900 |
| C  | 3.92079400  | -1.88926200 | -0.58524800 |
| N  | -1.23394500 | 1.61280100  | -0.77830000 |
| C  | -2.51713600 | 3.52278900  | -0.52286800 |
| C  | 1.74762400  | -2.31810200 | -0.97535200 |
| C  | 3.06393500  | -2.89920000 | -0.89891800 |
| H  | 4.99222900  | -1.93389100 | -0.43665600 |
| C  | -2.48276700 | 1.42033000  | -1.32493200 |
| C  | -3.28140900 | 2.61170800  | -1.18515500 |
| H  | -2.77052300 | 4.53455800  | -0.23245100 |
| C  | 0.60219800  | -3.01616700 | -1.32775100 |
| H  | 3.28262500  | -3.94664800 | -1.05839400 |
| C  | -2.93439400 | 0.23829400  | -1.88688600 |
| H  | -4.29748800 | 2.71529200  | -1.54428300 |
| C  | -0.62866100 | -2.43142600 | -1.57771600 |
| H  | 0.69309500  | -4.08659700 | -1.48211600 |
| C  | -2.21234300 | -0.94310600 | -1.89602200 |
| H  | -3.94604400 | 0.21724600  | -2.27975900 |
| N  | -0.91720800 | -1.08856600 | -1.44994400 |
| C  | -1.76640700 | -3.13876900 | -2.10892500 |
| C  | -2.73975400 | -2.21200500 | -2.32716300 |
| H  | -1.78985100 | -4.20310900 | -2.30606700 |
| H  | -3.73378800 | -2.35820700 | -2.73045600 |
| Fe | 0.20908700  | 0.26543100  | -0.53616400 |
| C  | -1.29568400 | -0.51452800 | 1.82917600  |
| C  | -1.17294100 | -0.83759600 | 3.22117400  |
| C  | -3.57146700 | -0.86793700 | 1.88911200  |
| C  | -2.32632400 | -1.20442500 | 3.89853400  |
| H  | -4.50586900 | -0.85873800 | 1.32825200  |
| C  | -3.55960200 | -1.22466900 | 3.23655500  |
| H  | -2.26252000 | -1.47089900 | 4.95173100  |
| H  | -4.47413800 | -1.50651000 | 3.74850800  |
| N  | -2.48576600 | -0.53011000 | 1.19230900  |
| C  | 1.34954300  | -1.03215000 | 2.96776500  |
| H  | 2.21591900  | -0.38947100 | 3.14015200  |
| H  | 0.84238200  | -0.55220900 | 1.87859100  |
| C  | 0.17561900  | -0.72871900 | 3.90245500  |
| H  | 0.20078800  | -1.38121900 | 4.78543200  |
| H  | 0.29681700  | 0.30169100  | 4.26563700  |
| C  | 1.71815800  | -2.43515800 | 2.69482200  |
| C  | 3.07281200  | -2.79919700 | 2.58421300  |
| C  | 0.74561800  | -3.43981000 | 2.50898700  |
| C  | 3.44706100  | -4.11490100 | 2.31978600  |
| H  | 3.83592000  | -2.03474000 | 2.70673600  |
| C  | 1.12041500  | -4.75222500 | 2.23381200  |

|                                       |             |             |             |
|---------------------------------------|-------------|-------------|-------------|
| H                                     | -0.30699600 | -3.18463200 | 2.57431200  |
| C                                     | 2.47249800  | -5.09906900 | 2.14145800  |
| H                                     | 4.50095200  | -4.37054900 | 2.24546300  |
| H                                     | 0.35371000  | -5.50955300 | 2.09118300  |
| H                                     | 2.76172100  | -6.12560000 | 1.93207100  |
| <b><sup>5</sup>TS<sub>2sp3</sub>'</b> |             |             |             |
| N                                     | 0.13878100  | -0.39003100 | -0.65045900 |
| H                                     | 3.15709800  | 1.58167400  | 3.78065800  |
| C                                     | 2.23149700  | 1.14566200  | 3.42652500  |
| C                                     | 1.53048300  | 0.09796100  | 3.95044100  |
| C                                     | 1.49976700  | 1.60261800  | 2.27478100  |
| C                                     | 0.37157700  | -0.08596500 | 3.11758800  |
| H                                     | 1.76488900  | -0.50233300 | 4.82038800  |
| N                                     | 0.36387800  | 0.84314600  | 2.09971400  |
| C                                     | 1.89883200  | 2.65284200  | 1.45928100  |
| C                                     | -0.57964300 | -1.07980800 | 3.30859500  |
| C                                     | 1.19298200  | 3.11324500  | 0.35806100  |
| H                                     | 2.82636100  | 3.15823500  | 1.70943600  |
| C                                     | -1.69465900 | -1.27331000 | 2.50734300  |
| H                                     | -0.44173100 | -1.75188700 | 4.14980900  |
| N                                     | 0.00504600  | 2.59603300  | -0.10268800 |
| C                                     | 1.61291700  | 4.21916900  | -0.46771400 |
| N                                     | -2.02970000 | -0.51573200 | 1.40632500  |
| C                                     | -2.67675300 | -2.30681200 | 2.71909900  |
| C                                     | -0.32662200 | 3.34820700  | -1.20450500 |
| C                                     | 0.66889000  | 4.36590600  | -1.43691800 |
| H                                     | 2.51495300  | 4.79644600  | -0.30926500 |
| C                                     | -3.20448400 | -1.04992400 | 0.92692200  |
| C                                     | -3.61231900 | -2.16822700 | 1.73914900  |
| H                                     | -2.64161900 | -3.03246200 | 3.52178300  |
| C                                     | -1.45185900 | 3.16499700  | -1.99422500 |
| H                                     | 0.63271000  | 5.08842800  | -2.24221200 |
| C                                     | -3.91176100 | -0.58184000 | -0.16949700 |
| H                                     | -4.50422400 | -2.75759900 | 1.56879300  |
| C                                     | -2.41834400 | 2.19379000  | -1.78248900 |
| H                                     | -1.58485700 | 3.82989600  | -2.84176600 |
| C                                     | -3.53560200 | 0.50017800  | -0.95046800 |
| H                                     | -4.82351500 | -1.10470000 | -0.43977800 |
| N                                     | -2.41133500 | 1.26805000  | -0.76425100 |
| C                                     | -3.58186500 | 2.01571900  | -2.61312100 |
| C                                     | -4.27557700 | 0.96432000  | -2.09564900 |
| H                                     | -3.81895900 | 2.62285300  | -3.47742300 |
| H                                     | -5.20083800 | 0.52638200  | -2.44787400 |
| Fe                                    | -0.90923400 | 0.90525000  | 0.52415600  |
| C                                     | -0.24536300 | -1.61639400 | -1.09767900 |
| C                                     | 0.40366000  | -2.81120100 | -0.63799400 |
| C                                     | -1.63006600 | -2.83876500 | -2.48077300 |

|   |             |             |             |
|---|-------------|-------------|-------------|
| C | -0.00466100 | -4.02131500 | -1.18190500 |
| H | -2.45041000 | -2.82072800 | -3.19838900 |
| C | -1.03761200 | -4.05345700 | -2.12417900 |
| H | 0.47589600  | -4.94381100 | -0.86056600 |
| H | -1.37666800 | -4.98734300 | -2.56173700 |
| N | -1.26099200 | -1.65365500 | -1.99981500 |
| C | 2.23700200  | -1.42595400 | 0.46231100  |
| H | 2.39023300  | -0.99393000 | 1.45093100  |
| H | 1.26285100  | -0.62230200 | -0.02334500 |
| C | 1.44345300  | -2.72654900 | 0.46327100  |
| H | 2.11470400  | -3.59515200 | 0.40670300  |
| H | 0.92034400  | -2.79136700 | 1.42692800  |
| C | 3.35558300  | -1.21488700 | -0.45666200 |
| C | 3.51927900  | -1.96741400 | -1.63874300 |
| C | 4.28252900  | -0.18267600 | -0.19269300 |
| C | 4.57626700  | -1.70683600 | -2.50759000 |
| H | 2.80691000  | -2.75110300 | -1.87772000 |
| C | 5.33556000  | 0.07631200  | -1.06337700 |
| H | 4.15632900  | 0.41606500  | 0.70654900  |
| C | 5.49043200  | -0.68695700 | -2.22621400 |
| H | 4.68623600  | -2.29980900 | -3.41198600 |
| H | 6.03983900  | 0.87325700  | -0.83804800 |
| H | 6.31269200  | -0.48570600 | -2.90752500 |

<sup>3</sup>TS<sub>2sp<sup>2</sup></sub>'

|   |             |             |             |
|---|-------------|-------------|-------------|
| N | 0.72983000  | -0.79835200 | -0.73345700 |
| H | -4.04505700 | -0.92627600 | -3.48474400 |
| C | -3.34563800 | -0.34993600 | -2.89249000 |
| C | -2.90672500 | 0.92085100  | -3.09306300 |
| C | -2.70002100 | -0.82794300 | -1.69321300 |
| C | -1.98676500 | 1.21553500  | -2.02128400 |
| H | -3.16581900 | 1.60979300  | -3.88703900 |
| N | -1.88297100 | 0.14497500  | -1.16582100 |
| C | -2.91249300 | -2.08294600 | -1.14796500 |
| C | -1.28310100 | 2.40337800  | -1.90787900 |
| C | -2.34410000 | -2.54421900 | 0.03087000  |
| H | -3.59557800 | -2.74707700 | -1.66864500 |
| C | -0.37184700 | 2.68864600  | -0.90270400 |
| H | -1.45516100 | 3.16494200  | -2.66201900 |
| N | -1.44413300 | -1.84831700 | 0.80386400  |
| C | -2.63289400 | -3.82739200 | 0.62336700  |
| N | -0.02803300 | 1.83438800  | 0.12100300  |
| C | 0.32350600  | 3.94464700  | -0.76857100 |
| C | -1.15972300 | -2.67049800 | 1.87170600  |
| C | -1.90062600 | -3.90417700 | 1.76976900  |
| H | -3.31660900 | -4.55724300 | 0.20851400  |
| C | 0.85800200  | 2.53990800  | 0.90676400  |

|    |             |             |             |
|----|-------------|-------------|-------------|
| C  | 1.08398000  | 3.85385300  | 0.35677700  |
| H  | 0.21896400  | 4.78055200  | -1.44859800 |
| C  | -0.26211000 | -2.38045800 | 2.88837500  |
| H  | -1.85510000 | -4.71113800 | 2.49018000  |
| C  | 1.45480300  | 2.06876500  | 2.06629100  |
| H  | 1.73639900  | 4.59912200  | 0.79409700  |
| C  | 0.46243000  | -1.20171300 | 2.99344900  |
| H  | -0.12217100 | -3.12733600 | 3.66389000  |
| C  | 1.24125300  | 0.81343300  | 2.61827900  |
| H  | 2.13816600  | 2.73461000  | 2.58452900  |
| N  | 0.40620600  | -0.15289300 | 2.09995700  |
| C  | 1.36499400  | -0.89745800 | 4.07594900  |
| C  | 1.84802500  | 0.35434100  | 3.84326800  |
| H  | 1.57764300  | -1.56086900 | 4.90477900  |
| H  | 2.53987900  | 0.93357800  | 4.44178000  |
| Fe | -0.55404300 | -0.10378100 | 0.30908600  |
| C  | 1.20842300  | -0.19513100 | -1.90314800 |
| C  | 2.45647600  | 0.48599200  | -1.86066200 |
| C  | 0.91242000  | 0.32357900  | -4.12066000 |
| C  | 2.89361000  | 1.10487100  | -3.02728000 |
| H  | 0.27572800  | 0.23545600  | -4.99995000 |
| C  | 2.10987200  | 1.03575100  | -4.18174300 |
| H  | 3.84044900  | 1.64115100  | -3.03141000 |
| H  | 2.42160500  | 1.51542200  | -5.10501600 |
| N  | 0.46701300  | -0.28566100 | -3.01729800 |
| C  | 3.25692500  | 0.45407700  | -0.58780300 |
| H  | 4.02716600  | 1.23394800  | -0.59059000 |
| C  | 3.06057300  | -2.06479100 | -0.84451400 |
| C  | 3.38954600  | -2.76310700 | -1.99476900 |
| C  | 1.76029900  | -2.27674300 | -0.23340200 |
| C  | 2.54352900  | -3.75110100 | -2.52577900 |
| H  | 4.32963600  | -2.54224600 | -2.49564900 |
| C  | 0.98393700  | -3.39757500 | -0.71758800 |
| H  | 1.67651300  | -2.04363300 | 0.82348000  |
| C  | 1.34412500  | -4.07043900 | -1.86622100 |
| H  | 2.83009500  | -4.27993800 | -3.43036800 |
| H  | 0.07930800  | -3.66632700 | -0.19036500 |
| H  | 0.71060300  | -4.86659800 | -2.24833900 |
| H  | 2.58797600  | 0.65241900  | 0.24866900  |
| C  | 3.92958600  | -0.93812100 | -0.35480600 |
| H  | 4.14065400  | -1.04089600 | 0.71829000  |
| H  | 4.89034000  | -0.97086100 | -0.88146200 |

**<sup>5</sup>TS<sub>2</sub><sub>sp2</sub>'**

|   |            |             |             |
|---|------------|-------------|-------------|
| N | 0.16663800 | 0.02797200  | 0.81646500  |
| H | 0.10900100 | -5.43168500 | -0.39662100 |
| C | 0.39989900 | -4.43302000 | -0.69665400 |

|    |             |             |             |
|----|-------------|-------------|-------------|
| C  | 1.60915400  | -3.99650600 | -1.14043100 |
| C  | -0.47727500 | -3.28606700 | -0.69108500 |
| C  | 1.47109300  | -2.58338800 | -1.40415000 |
| H  | 2.52224600  | -4.56135000 | -1.27991400 |
| N  | 0.19101300  | -2.17085800 | -1.13538800 |
| C  | -1.80512000 | -3.32104400 | -0.29243400 |
| C  | 2.50284200  | -1.77034200 | -1.85074400 |
| C  | -2.66528600 | -2.23107800 | -0.28963200 |
| H  | -2.20573300 | -4.27538500 | 0.03522400  |
| C  | 2.39214300  | -0.41147500 | -2.11127700 |
| H  | 3.47100100  | -2.23336600 | -2.01358600 |
| N  | -2.32780100 | -0.94702500 | -0.65329700 |
| C  | -4.05071000 | -2.29003900 | 0.10345200  |
| N  | 1.25179700  | 0.34094100  | -1.95145900 |
| C  | 3.46362400  | 0.40820400  | -2.62044900 |
| C  | -3.47175600 | -0.19818000 | -0.50140300 |
| C  | -4.55198700 | -1.02893100 | -0.03003200 |
| H  | -4.56066800 | -3.18769500 | 0.42946100  |
| C  | 1.58014900  | 1.61299000  | -2.36231300 |
| C  | 2.95901900  | 1.66371000  | -2.77989600 |
| H  | 4.46396100  | 0.05124400  | -2.83051200 |
| C  | -3.57997000 | 1.16566900  | -0.74303100 |
| H  | -5.55733700 | -0.67836900 | 0.16683300  |
| C  | 0.71918600  | 2.70237600  | -2.36720500 |
| H  | 3.45841600  | 2.55078800  | -3.14858700 |
| C  | -2.55332100 | 1.97649800  | -1.20865600 |
| H  | -4.54715300 | 1.62895500  | -0.57426100 |
| C  | -0.60585400 | 2.67064500  | -1.95374800 |
| H  | 1.11205600  | 3.65117600  | -2.71932900 |
| N  | -1.26496900 | 1.56216900  | -1.46738000 |
| C  | -2.69822600 | 3.37819100  | -1.51430700 |
| C  | -1.49134200 | 3.80796300  | -1.97834700 |
| H  | -3.61525200 | 3.94170600  | -1.39638100 |
| H  | -1.21298000 | 4.79683300  | -2.32028300 |
| Fe | -0.47373000 | -0.26277600 | -1.07146000 |
| C  | 1.45340000  | -0.09617500 | 1.27667800  |
| C  | 2.26060300  | 1.07341700  | 1.42217700  |
| C  | 3.19479800  | -1.46910600 | 1.87496800  |
| C  | 3.58633400  | 0.89439300  | 1.79611500  |
| H  | 3.53634200  | -2.48850800 | 2.05191600  |
| C  | 4.07541000  | -0.39557200 | 2.02573700  |
| H  | 4.23738600  | 1.76007500  | 1.90233200  |
| H  | 5.10819600  | -0.56437200 | 2.31558200  |
| N  | 1.91630600  | -1.34225900 | 1.51374800  |
| C  | 1.63647900  | 2.41980800  | 1.16893900  |
| H  | 2.40907600  | 3.18114500  | 1.00968100  |
| C  | -0.10503200 | 1.73256600  | 2.88972900  |

|   |             |             |            |
|---|-------------|-------------|------------|
| C | 0.12472800  | 1.23798200  | 4.16216100 |
| C | -0.99308100 | 1.00713400  | 2.00815800 |
| C | -0.56720400 | 0.11465400  | 4.65031100 |
| H | 0.85286700  | 1.73377800  | 4.80027900 |
| C | -1.78338900 | -0.05934300 | 2.57191300 |
| H | -1.42081200 | 1.55317000  | 1.17279600 |
| C | -1.53351300 | -0.51846600 | 3.84897200 |
| H | -0.36522500 | -0.24944000 | 5.65363000 |
| H | -2.53046900 | -0.53486000 | 1.94938700 |
| H | -2.09498300 | -1.36175500 | 4.24216400 |
| H | 1.04247400  | 2.36336200  | 0.25391600 |
| C | 0.70558500  | 2.87450700  | 2.33603400 |
| H | 0.05091200  | 3.67270100  | 1.95884900 |
| H | 1.31448700  | 3.30560300  | 3.13925300 |

**<sup>3</sup>Ni''**

|   |             |             |             |
|---|-------------|-------------|-------------|
| N | -0.07537800 | -0.15470900 | 0.47131100  |
| H | 3.27229900  | 2.16460100  | -3.56894400 |
| C | 2.42731500  | 2.21972100  | -2.89427700 |
| C | 2.02950800  | 3.26118500  | -2.11139900 |
| C | 1.50021900  | 1.14150900  | -2.65370000 |
| C | 0.84958000  | 2.82379900  | -1.40911100 |
| H | 2.47631600  | 4.24226000  | -2.01243100 |
| N | 0.52811800  | 1.53293500  | -1.75908200 |
| C | 1.62197700  | -0.12478400 | -3.20557700 |
| C | 0.12430300  | 3.61305600  | -0.52936500 |
| C | 0.77715100  | -1.19131400 | -2.93945600 |
| H | 2.45988800  | -0.30253800 | -3.87256100 |
| C | -1.07899900 | 3.24206800  | 0.04610700  |
| H | 0.49681800  | 4.61105700  | -0.32091300 |
| N | -0.33886900 | -1.14104700 | -2.13383700 |
| C | 0.96739100  | -2.52509700 | -3.45446800 |
| N | -1.70438400 | 2.02467700  | -0.12337800 |
| C | -1.90240500 | 4.12408100  | 0.83504700  |
| C | -0.84276300 | -2.42082500 | -2.12304500 |
| C | -0.03328900 | -3.29151100 | -2.93860600 |
| H | 1.77015400  | -2.81882700 | -4.11874300 |
| C | -2.90932500 | 2.13441500  | 0.53316300  |
| C | -3.04520600 | 3.44325800  | 1.12050900  |
| H | -1.63328500 | 5.13784100  | 1.10298300  |
| C | -1.98735400 | -2.81533100 | -1.44728800 |
| H | -0.22722800 | -4.34500100 | -3.09503600 |
| C | -3.85697600 | 1.13200000  | 0.63952300  |
| H | -3.90945700 | 3.77712600  | 1.68049700  |
| C | -2.81240600 | -1.95996100 | -0.73619200 |
| H | -2.28380700 | -3.85710800 | -1.51930600 |
| C | -3.68353600 | -0.15829000 | 0.16948500  |



|    |             |             |             |
|----|-------------|-------------|-------------|
| H  | -4.77211000 | 1.35501800  | 1.17874600  |
| N  | -2.58833600 | -0.61296700 | -0.53219400 |
| C  | -4.06999300 | -2.35186000 | -0.15312000 |
| C  | -4.61819000 | -1.23102000 | 0.39109600  |
| H  | -4.47415100 | -3.35568000 | -0.18514500 |
| H  | -5.56327500 | -1.12324800 | 0.90799900  |
| Fe | -0.91439500 | 0.38292300  | -0.92120900 |
| C  | -0.32502500 | -0.48848900 | 1.75019000  |
| C  | 0.63774900  | -1.31365500 | 2.43309100  |
| C  | -1.67233100 | -0.37209400 | 3.62346000  |
| C  | 0.35685300  | -1.63498100 | 3.75752900  |
| H  | -2.59151700 | 0.01361900  | 4.06418300  |
| C  | -0.80463400 | -1.16834400 | 4.37820000  |
| H  | 1.05448900  | -2.26107300 | 4.30952100  |
| H  | -1.03248200 | -1.41480400 | 5.41061400  |
| N  | -1.45565800 | -0.03754600 | 2.35770900  |
| C  | 1.64557400  | -2.64119600 | 0.49141900  |
| C  | 2.89817300  | -3.32262300 | -0.06473500 |
| H  | 1.20209000  | -1.99754800 | -0.26953400 |
| H  | 0.88410300  | -3.39585300 | 0.72836500  |
| C  | 1.91546600  | -1.82322900 | 1.77564400  |
| H  | 2.36132300  | -2.52187500 | 2.49772600  |
| C  | 2.92425300  | -0.68368400 | 1.60945600  |
| C  | 3.79171500  | -0.38624600 | 2.66949800  |
| C  | 2.99715100  | 0.09993000  | 0.45051100  |
| C  | 4.70414300  | 0.66590400  | 2.58346700  |
| H  | 3.74826300  | -0.98603800 | 3.57665500  |
| C  | 3.90989600  | 1.15283300  | 0.35916700  |
| H  | 2.33382900  | -0.10117700 | -0.38027100 |
| C  | 4.76520100  | 1.44179900  | 1.42404300  |
| H  | 5.36713500  | 0.87633200  | 3.41908600  |
| H  | 3.94001100  | 1.74897700  | -0.54787500 |
| H  | 5.47450700  | 2.26240600  | 1.35091000  |
| H  | 2.65225200  | -3.89425500 | -0.96649700 |
| H  | 3.66224400  | -2.58433100 | -0.33070400 |
| H  | 3.34029000  | -4.01141500 | 0.66680500  |

**<sup>5</sup>Ni''**

|   |             |             |             |
|---|-------------|-------------|-------------|
| N | -0.03006200 | -0.49486600 | -0.61894500 |
| H | -2.85273200 | 4.18637400  | 1.79988000  |
| C | -1.99715800 | 3.80359300  | 1.25751900  |
| C | -1.36999900 | 4.34824300  | 0.17387700  |
| C | -1.28797400 | 2.58763800  | 1.58507200  |
| C | -0.27341200 | 3.46953100  | -0.16249300 |
| H | -1.61028100 | 5.26603400  | -0.34806700 |
| N | -0.25066600 | 2.40451000  | 0.70363800  |
| C | -1.60719500 | 1.73659700  | 2.64452200  |

|    |             |             |             |
|----|-------------|-------------|-------------|
| C  | 0.64582800  | 3.69439000  | -1.18877900 |
| C  | -0.91618200 | 0.58457900  | 3.01970500  |
| H  | -2.46932200 | 2.00798200  | 3.24686500  |
| C  | 1.76357200  | 2.91426000  | -1.48235100 |
| H  | 0.49231900  | 4.58082700  | -1.79744800 |
| N  | 0.19470400  | 0.08414700  | 2.38405900  |
| C  | -1.25625600 | -0.26063800 | 4.14232100  |
| N  | 2.11895800  | 1.76613000  | -0.82192300 |
| C  | 2.73347700  | 3.20129500  | -2.51707700 |
| C  | 0.56865000  | -1.04515100 | 3.06797500  |
| C  | -0.33837600 | -1.27015800 | 4.17116300  |
| H  | -2.08566100 | -0.08914600 | 4.81691300  |
| C  | 3.27629900  | 1.31470900  | -1.40172900 |
| C  | 3.67021300  | 2.21199000  | -2.46601500 |
| H  | 2.69431800  | 4.05445700  | -3.18277300 |
| C  | 1.66461700  | -1.84833700 | 2.75001700  |
| H  | -0.26567000 | -2.08941600 | 4.87547400  |
| C  | 3.97235800  | 0.16928900  | -1.01908200 |
| H  | 4.55343200  | 2.09262400  | -3.08101200 |
| C  | 2.58367400  | -1.62110500 | 1.72645300  |
| H  | 1.83185600  | -2.72093800 | 3.37485700  |
| C  | 3.63210100  | -0.70040400 | 0.01600100  |
| H  | 4.87051300  | -0.06892900 | -1.58140700 |
| N  | 2.54566400  | -0.56740500 | 0.84520400  |
| C  | 3.73632000  | -2.44625400 | 1.44515600  |
| C  | 4.38515300  | -1.87544300 | 0.38961600  |
| H  | 4.00864900  | -3.33693400 | 1.99761700  |
| H  | 5.29541100  | -2.20554400 | -0.09523100 |
| Fe | 0.88716200  | 0.64614700  | 0.46266000  |
| C  | 0.04927600  | -1.60278200 | -1.34141700 |
| C  | -1.05397500 | -2.53624200 | -1.37003900 |
| C  | 1.29313000  | -2.92072500 | -2.78590000 |
| C  | -0.90556700 | -3.67821000 | -2.15668900 |
| H  | 2.22322800  | -3.06325600 | -3.33575400 |
| C  | 0.27155300  | -3.88950100 | -2.87073000 |
| H  | -1.71321700 | -4.40499700 | -2.20586400 |
| H  | 0.40651200  | -4.77540100 | -3.48424600 |
| N  | 1.20117200  | -1.81756100 | -2.06982600 |
| C  | -2.09161100 | -2.31091800 | 0.93563300  |
| C  | -3.38265700 | -2.28208500 | 1.75739800  |
| H  | -1.45035700 | -1.47123400 | 1.20618200  |
| H  | -1.52195100 | -3.21809900 | 1.17601800  |
| C  | -2.33969300 | -2.29942500 | -0.59168800 |
| H  | -2.98608800 | -3.16186100 | -0.80928500 |
| C  | -3.07604500 | -1.06577400 | -1.12313100 |
| C  | -3.86843700 | -1.19628400 | -2.27101700 |
| C  | -2.95964300 | 0.19939700  | -0.53413400 |

|   |             |             |             |
|---|-------------|-------------|-------------|
| C | -4.52051600 | -0.09386200 | -2.82630200 |
| H | -3.96963200 | -2.17303700 | -2.74075100 |
| C | -3.60902300 | 1.30524500  | -1.08530000 |
| H | -2.35090000 | 0.33186200  | 0.34967700  |
| C | -4.38931600 | 1.16418200  | -2.23482700 |
| H | -5.12853200 | -0.21879100 | -3.71882300 |
| H | -3.49018800 | 2.27735200  | -0.61493500 |
| H | -4.89213900 | 2.02639600  | -2.66533600 |
| H | -3.14995400 | -2.30520700 | 2.82719500  |
| H | -3.95918700 | -1.37316100 | 1.55695000  |
| H | -4.02417000 | -3.14228700 | 1.52631800  |

**<sup>3</sup>TS<sub>2sp3</sub>'**

|   |             |             |             |
|---|-------------|-------------|-------------|
| N | -0.08227900 | -0.04012100 | -0.57490100 |
| H | 2.64074900  | 3.26183200  | 3.01552200  |
| C | 2.05120700  | 2.37171200  | 2.83639100  |
| C | 2.24013200  | 1.11492100  | 3.32437600  |
| C | 0.88394300  | 2.31852400  | 1.99207500  |
| C | 1.18430500  | 0.29575700  | 2.78258000  |
| H | 3.01566000  | 0.75810700  | 3.99014600  |
| N | 0.35415100  | 1.04599900  | 1.98059300  |
| C | 0.39370000  | 3.39660000  | 1.27155000  |
| C | 1.04038200  | -1.06115900 | 3.03416700  |
| C | -0.69849100 | 3.34780800  | 0.41757800  |
| H | 0.91503800  | 4.34412300  | 1.36750700  |
| C | 0.00201500  | -1.84850000 | 2.56311500  |
| H | 1.77673300  | -1.53363200 | 3.67700700  |
| N | -1.46570000 | 2.23096300  | 0.17243400  |
| C | -1.17006800 | 4.46446600  | -0.36355400 |
| N | -1.02424200 | -1.41728200 | 1.75066000  |
| C | -0.19132500 | -3.23077800 | 2.92733100  |
| C | -2.39925800 | 2.62088700  | -0.75936100 |
| C | -2.22385300 | 4.01124400  | -1.09921500 |
| H | -0.73963000 | 5.45764600  | -0.33978300 |
| C | -1.86421900 | -2.49935500 | 1.61241200  |
| C | -1.35608900 | -3.62981500 | 2.34817000  |
| H | 0.47865600  | -3.79808900 | 3.56087500  |
| C | -3.38987300 | 1.80452300  | -1.28557400 |
| H | -2.83992900 | 4.55541400  | -1.80386600 |
| C | -3.02933100 | -2.51546900 | 0.86545000  |
| H | -1.84103300 | -4.59629900 | 2.40075500  |
| C | -3.61546200 | 0.49023800  | -0.91023900 |
| H | -4.06260600 | 2.23922100  | -2.01853900 |
| C | -3.47697300 | -1.45594200 | 0.09488800  |
| H | -3.60558000 | -3.43510300 | 0.84513400  |
| N | -2.86935700 | -0.22335100 | 0.00444500  |
| C | -4.71303600 | -0.30900100 | -1.39485300 |

|    |             |             |             |
|----|-------------|-------------|-------------|
| C  | -4.63444000 | -1.51078100 | -0.76094600 |
| H  | -5.44619900 | 0.02846400  | -2.11650100 |
| H  | -5.28568600 | -2.37015800 | -0.85786700 |
| Fe | -1.13841000 | 0.33506100  | 0.80640300  |
| C  | 0.12354600  | -1.10078900 | -1.41226300 |
| C  | 1.21508300  | -1.04303300 | -2.33946700 |
| C  | -0.48875400 | -3.18637800 | -2.16855800 |
| C  | 1.38930000  | -2.12303400 | -3.19143400 |
| H  | -1.17958000 | -4.02285700 | -2.06574100 |
| C  | 0.52921200  | -3.22433200 | -3.12036200 |
| H  | 2.21035400  | -2.10969400 | -3.90539300 |
| H  | 0.64837900  | -4.08066500 | -3.77642900 |
| N  | -0.70343800 | -2.16381600 | -1.33916200 |
| C  | 1.44003500  | 1.41787000  | -1.91442000 |
| H  | 2.04599700  | 2.12763000  | -1.34755800 |
| H  | 0.62726700  | 0.89675500  | -1.00622300 |
| C  | 2.17856500  | 0.14183000  | -2.32140400 |
| H  | 2.56078900  | 0.27259600  | -3.34571400 |
| C  | 0.52536900  | 2.03411300  | -2.94574700 |
| H  | -0.04724200 | 2.86415200  | -2.52163300 |
| H  | 1.10374900  | 2.41959900  | -3.79979500 |
| H  | -0.18191300 | 1.29138500  | -3.33307300 |
| C  | 3.37249100  | -0.13484400 | -1.41204500 |
| C  | 3.19412800  | -0.35978900 | -0.03849000 |
| C  | 4.67073800  | -0.15769900 | -1.93339300 |
| C  | 4.29114600  | -0.59473400 | 0.78830900  |
| H  | 2.19558600  | -0.35209600 | 0.38402400  |
| C  | 5.77136600  | -0.39689400 | -1.10602700 |
| H  | 4.82395600  | 0.01540100  | -2.99671000 |
| C  | 5.58474400  | -0.61511000 | 0.25951700  |
| H  | 4.12861600  | -0.75964900 | 1.84990800  |
| H  | 6.77227200  | -0.41078100 | -1.53016500 |
| H  | 6.43890800  | -0.79994200 | 0.90581800  |

**<sup>5</sup>TS<sub>2</sub><sub>sp3</sub>'**

|   |             |             |             |
|---|-------------|-------------|-------------|
| N | -0.05839900 | -0.21674000 | -0.74711800 |
| H | 2.54468000  | 3.27369300  | 2.92936900  |
| C | 1.93487000  | 2.39025800  | 2.78924800  |
| C | 2.04815600  | 1.17604200  | 3.39546500  |
| C | 0.81238800  | 2.30492400  | 1.88866100  |
| C | 1.00088700  | 0.34331900  | 2.85913000  |
| H | 2.77037300  | 0.85578100  | 4.13553300  |
| N | 0.25041500  | 1.04926100  | 1.94402700  |
| C | 0.36621200  | 3.35172300  | 1.09492800  |
| C | 0.80734500  | -0.98747100 | 3.19971500  |
| C | -0.74505700 | 3.30151500  | 0.26354500  |
| H | 0.91339000  | 4.28797000  | 1.14482900  |

|    |             |             |             |
|----|-------------|-------------|-------------|
| C  | -0.19659800 | -1.79847200 | 2.68980000  |
| H  | 1.48976500  | -1.42605200 | 3.92106900  |
| N  | -1.55467300 | 2.20430700  | 0.07762800  |
| C  | -1.21988400 | 4.41018400  | -0.52494200 |
| N  | -1.15681000 | -1.40685900 | 1.78416800  |
| C  | -0.38530800 | -3.18018600 | 3.05228000  |
| C  | -2.52932700 | 2.60111100  | -0.81135700 |
| C  | -2.32821900 | 3.97602600  | -1.19068100 |
| H  | -0.75795800 | 5.38912300  | -0.55047500 |
| C  | -1.94483300 | -2.51348000 | 1.57069000  |
| C  | -1.46991500 | -3.62339600 | 2.35732400  |
| H  | 0.23799100  | -3.72330100 | 3.75122800  |
| C  | -3.56076900 | 1.80189400  | -1.28370200 |
| H  | -2.96254700 | 4.52467200  | -1.87526500 |
| C  | -3.05267500 | -2.56570600 | 0.73851600  |
| H  | -1.92122900 | -4.60744300 | 2.36643800  |
| C  | -3.76754300 | 0.47867600  | -0.92357800 |
| H  | -4.25858500 | 2.24651600  | -1.98640500 |
| C  | -3.53404600 | -1.50209400 | -0.00907100 |
| H  | -3.58362000 | -3.50976100 | 0.66861500  |
| N  | -2.98326400 | -0.24403000 | -0.05375400 |
| C  | -4.84344000 | -0.34018400 | -1.42572400 |
| C  | -4.69777500 | -1.56912700 | -0.85845300 |
| H  | -5.60093800 | -0.00155100 | -2.12112700 |
| H  | -5.31051900 | -2.45165300 | -0.99201900 |
| Fe | -1.23427900 | 0.32821300  | 0.76702000  |
| C  | 0.34373300  | -1.20798600 | -1.56902300 |
| C  | 1.51916500  | -1.05447200 | -2.37969300 |
| C  | -0.02841100 | -3.32364800 | -2.40130700 |
| C  | 1.86676400  | -2.10333400 | -3.21823200 |
| H  | -0.65288300 | -4.21670800 | -2.38651200 |
| C  | 1.08742700  | -3.26364100 | -3.24486000 |
| H  | 2.75435200  | -2.01957200 | -3.84224000 |
| H  | 1.33706100  | -4.09821900 | -3.89249600 |
| N  | -0.40835000 | -2.34293100 | -1.58733400 |
| C  | 1.50886300  | 1.40200000  | -1.85992800 |
| H  | 2.01094500  | 2.13263800  | -1.22280700 |
| H  | 0.66577200  | 0.80527300  | -1.08097500 |
| C  | 2.37898600  | 0.19860400  | -2.23532400 |
| H  | 2.84962800  | 0.39480200  | -3.21102900 |
| C  | 0.66278600  | 1.99713000  | -2.96281600 |
| H  | -0.02627800 | 2.75005700  | -2.56803500 |
| H  | 1.29437500  | 2.47883200  | -3.72477500 |
| H  | 0.07222000  | 1.22091900  | -3.46329800 |
| C  | 3.49298300  | -0.03351000 | -1.21767500 |
| C  | 3.19481300  | -0.28859400 | 0.12981500  |
| C  | 4.83449700  | 0.00672100  | -1.61351200 |

|   |            |             |             |
|---|------------|-------------|-------------|
| C | 4.21840200 | -0.49307600 | 1.05350200  |
| H | 2.16115600 | -0.32929000 | 0.45716700  |
| C | 5.86128100 | -0.20024300 | -0.68851200 |
| H | 5.07964300 | 0.20436200  | -2.65507900 |
| C | 5.55572400 | -0.45078300 | 0.64976100  |
| H | 3.96368100 | -0.68374500 | 2.09212100  |
| H | 6.89747500 | -0.16419500 | -1.01546600 |
| H | 6.35197500 | -0.61206600 | 1.37185900  |

**<sup>3</sup>TS<sub>sp2</sub>'**

|   |             |             |             |
|---|-------------|-------------|-------------|
| N | 0.10027200  | -0.17942600 | 0.68056500  |
| H | -2.14482200 | 4.78657700  | 2.00429400  |
| C | -2.20267000 | 3.90848800  | 1.37362000  |
| C | -3.30510700 | 3.22331700  | 0.96853000  |
| C | -1.06563400 | 3.26325900  | 0.76038200  |
| C | -2.83954100 | 2.13978900  | 0.13692500  |
| H | -4.34447000 | 3.41345900  | 1.20461800  |
| N | -1.47081200 | 2.17752300  | 0.01781100  |
| C | 0.22926000  | 3.74937500  | 0.82481200  |
| C | -3.66684500 | 1.18226900  | -0.42460500 |
| C | 1.29478300  | 3.24841300  | 0.08909500  |
| H | 0.40723100  | 4.63223300  | 1.43107500  |
| C | -3.21827500 | 0.07231300  | -1.12303700 |
| H | -4.73572000 | 1.27740100  | -0.26042400 |
| N | 1.25155400  | 2.12361100  | -0.70307200 |
| C | 2.59207100  | 3.87160000  | 0.01112900  |
| N | -1.90310000 | -0.20346200 | -1.41926600 |
| C | -4.07699000 | -0.97694600 | -1.61376400 |
| C | 2.50067000  | 2.02881900  | -1.27922000 |
| C | 3.33688300  | 3.12204800  | -0.85047600 |
| H | 2.87431800  | 4.77435700  | 0.53796000  |
| C | -1.92138900 | -1.40195900 | -2.09942500 |
| C | -3.27102600 | -1.90103500 | -2.20429300 |
| H | -5.15449400 | -0.98822200 | -1.50905100 |
| C | 2.92884000  | 0.99321600  | -2.09682600 |
| H | 4.35962300  | 3.27700400  | -1.17020500 |
| C | -0.82314000 | -2.00351700 | -2.69125400 |
| H | -3.54810900 | -2.82599200 | -2.69407000 |
| C | 2.14951600  | -0.08881200 | -2.47795500 |
| H | 3.95264400  | 1.02724400  | -2.45666300 |
| C | 0.45010700  | -1.45174300 | -2.73764800 |
| H | -0.98175300 | -2.94472100 | -3.20849700 |
| N | 0.82926600  | -0.27838500 | -2.12427800 |
| C | 2.60872600  | -1.17090900 | -3.31191300 |
| C | 1.55500200  | -2.02047700 | -3.46830800 |
| H | 3.60698900  | -1.24985000 | -3.72343000 |
| H | 1.50845700  | -2.94168000 | -4.03520000 |

|    |             |             |             |
|----|-------------|-------------|-------------|
| Fe | -0.27459900 | 0.80422300  | -0.80598200 |
| C  | -0.82619000 | -0.97374000 | 1.34707600  |
| C  | -0.54729700 | -2.33063600 | 1.70033400  |
| C  | -2.97261700 | -1.15778600 | 2.18658400  |
| C  | -1.56121400 | -3.07387700 | 2.29189200  |
| H  | -3.91695800 | -0.64641300 | 2.37238900  |
| C  | -2.81237200 | -2.49869300 | 2.52828700  |
| H  | -1.36755800 | -4.10813900 | 2.57004500  |
| H  | -3.62179600 | -3.06293500 | 2.98116900  |
| N  | -2.01674100 | -0.41208600 | 1.63237800  |
| C  | 1.11516400  | -3.36582400 | 0.06881700  |
| C  | 2.53494800  | -3.89580600 | -0.14487800 |
| H  | 0.91718800  | -2.53998200 | -0.61474100 |
| H  | 0.37880400  | -4.14253200 | -0.17414900 |
| C  | 0.85096700  | -2.89487900 | 1.51223800  |
| H  | 0.96522300  | -3.75907800 | 2.18098900  |
| C  | 1.74973700  | -1.78130500 | 1.99634200  |
| C  | 2.14456800  | -1.72451300 | 3.32340600  |
| C  | 1.89971800  | -0.62697600 | 1.13539600  |
| C  | 2.73507700  | -0.57255400 | 3.86185800  |
| H  | 1.96711300  | -2.58699800 | 3.96241700  |
| C  | 2.56952200  | 0.51812600  | 1.71035700  |
| H  | 2.10449400  | -0.81191000 | 0.08543500  |
| C  | 2.93440600  | 0.55116200  | 3.03993600  |
| H  | 3.03880500  | -0.55278800 | 4.90471100  |
| H  | 2.80268000  | 1.35791800  | 1.07533900  |
| H  | 3.41556600  | 1.43862700  | 3.44310300  |
| H  | 2.68332600  | -4.20326400 | -1.18590000 |
| H  | 3.28053800  | -3.12607600 | 0.08513700  |
| H  | 2.74122700  | -4.75970200 | 0.49970300  |

**<sup>5</sup>TS<sub>sp2</sub>'**

|   |             |             |             |
|---|-------------|-------------|-------------|
| N | -0.26144700 | -0.10829100 | -0.90980800 |
| H | 4.79733800  | 2.30355100  | -2.27783500 |
| C | 4.27575700  | 1.53912900  | -1.71596700 |
| C | 4.56259400  | 0.21363300  | -1.61363000 |
| C | 3.11229800  | 1.77517000  | -0.89303400 |
| C | 3.57014700  | -0.36138300 | -0.73537100 |
| H | 5.36867100  | -0.34146900 | -2.07653800 |
| N | 2.68846700  | 0.60317700  | -0.31361600 |
| C | 2.54528400  | 3.02351300  | -0.68558700 |
| C | 3.54257700  | -1.69641500 | -0.36331600 |
| C | 1.47087900  | 3.27781400  | 0.15615900  |
| H | 2.99290900  | 3.87042200  | -1.19649100 |
| C | 2.59928900  | -2.26748100 | 0.47794600  |
| H | 4.30974600  | -2.34702900 | -0.77150100 |
| N | 0.76477300  | 2.32474900  | 0.85859600  |

|    |             |             |             |
|----|-------------|-------------|-------------|
| C  | 0.92395800  | 4.58671800  | 0.40297300  |
| N  | 1.55544900  | -1.60236100 | 1.07572800  |
| C  | 2.56298100  | -3.66630700 | 0.82051600  |
| C  | -0.21474600 | 3.01094300  | 1.54147200  |
| C  | -0.12312100 | 4.42050700  | 1.26195600  |
| H  | 1.30250100  | 5.50425200  | -0.02941100 |
| C  | 0.85693200  | -2.55563000 | 1.77885100  |
| C  | 1.47434400  | -3.84820800 | 1.61986800  |
| H  | 3.28014900  | -4.40225000 | 0.47937100  |
| C  | -1.16857400 | 2.43868000  | 2.37527700  |
| H  | -0.77941700 | 5.17428600  | 1.67831900  |
| C  | -0.26628600 | -2.31738600 | 2.55976200  |
| H  | 1.11569100  | -4.76220200 | 2.07603000  |
| C  | -1.25292000 | 1.08683600  | 2.67744100  |
| H  | -1.88857000 | 3.10313400  | 2.84276500  |
| C  | -0.83777300 | -1.07070900 | 2.76635600  |
| H  | -0.70952900 | -3.16424200 | 3.07428700  |
| N  | -0.43060200 | 0.10372200  | 2.16937300  |
| C  | -2.20852900 | 0.51402300  | 3.59367900  |
| C  | -1.95036800 | -0.82246600 | 3.64968700  |
| H  | -2.96389900 | 1.07834100  | 4.12576900  |
| H  | -2.45203200 | -1.58288600 | 4.23454800  |
| Fe | 0.99850000  | 0.31682000  | 0.75333100  |
| C  | -0.53409600 | -1.35637500 | -1.38587500 |
| C  | -1.85361800 | -1.91063700 | -1.48715600 |
| C  | 0.40588100  | -3.33994600 | -2.12057900 |
| C  | -1.97255900 | -3.23543800 | -1.89269400 |
| H  | 1.31947900  | -3.87459500 | -2.37929000 |
| C  | -0.83527400 | -3.98235600 | -2.20313800 |
| H  | -2.96259800 | -3.68097800 | -1.97041200 |
| H  | -0.90540400 | -5.01926600 | -2.51709500 |
| N  | 0.56555100  | -2.07951500 | -1.73793600 |
| C  | -3.40664100 | -1.07386000 | 0.33334700  |
| C  | -4.61056600 | -0.20297500 | 0.69738400  |
| H  | -2.52763300 | -0.74990600 | 0.89303800  |
| H  | -3.58630000 | -2.11460200 | 0.63149200  |
| C  | -3.07580100 | -1.06281300 | -1.17606200 |
| H  | -3.93309000 | -1.49077100 | -1.71398400 |
| C  | -2.77786900 | 0.30410100  | -1.74675300 |
| C  | -3.19404600 | 0.65803100  | -3.02124900 |
| C  | -1.80240000 | 1.10823500  | -1.06005200 |
| C  | -2.71610500 | 1.82014100  | -3.64449900 |
| H  | -3.88958200 | 0.00989700  | -3.55034900 |
| C  | -1.36002600 | 2.31562800  | -1.70344600 |
| H  | -1.82284300 | 1.12023400  | 0.02501400  |
| C  | -1.78851900 | 2.63947700  | -2.97536400 |
| H  | -3.06091500 | 2.08319500  | -4.64055800 |



|   |             |             |             |
|---|-------------|-------------|-------------|
| H | -0.67721500 | 2.96684700  | -1.17579000 |
| H | -1.42773100 | 3.54738400  | -3.45198100 |
| H | -4.80498700 | -0.24454900 | 1.77452700  |
| H | -4.43339400 | 0.84431200  | 0.42754300  |
| H | -5.51620900 | -0.53196100 | 0.17215700  |
